# Supplementary material
Source: PubMed Central journal article supplement (PMC2263112)
Supplement: cmaj_178_6_701_v2_3.pdf [file cmaj_178_6_701_v2_3.pdf]

**Appendix 3: Characteristics of studies of uterine artery Doppler ultrasonography used to predict pre-eclampsia in patients at low risk or unspecified risk (Appendix 3A) and in patients at high risk (Appendix 3B)**

| Appendix 3A: Patients at low risk or unspecified risk of pre-eclampsia (part 1 of 9) |               |                                              |                                                                                                                                                                                                      |                                                                                                                                                                                                                                                             |                                                       |                                                                                                                        |                                                                                             |                                                                                                   |  |
|--------------------------------------------------------------------------------------|---------------|----------------------------------------------|------------------------------------------------------------------------------------------------------------------------------------------------------------------------------------------------------|-------------------------------------------------------------------------------------------------------------------------------------------------------------------------------------------------------------------------------------------------------------|-------------------------------------------------------|------------------------------------------------------------------------------------------------------------------------|---------------------------------------------------------------------------------------------|---------------------------------------------------------------------------------------------------|--|
| Study, country                                                                       | Gestation, wk | Total no. of patients (% with pre-eclampsia) | Patient group (study design*)                                                                                                                                                                        | Reference standard for pre-eclampsia                                                                                                                                                                                                                        | Details of index test                                 | Index test cutoff point, centile or absolute threshold                                                                 | Sensitivity, TP/(TP + FN)                                                                   | Specificity, TN/(FP + TN)                                                                         |  |
| Aardema et al, <sup>1</sup><br>the Netherlands                                       | 21-22         | 531 (0.9)                                    | Healthy, nulliparous women                                                                                                                                                                           | Diastolic pressure $\geq$ 90 mm Hg twice; proteinuria = dipstick $\geq$ 2+ (International Society for the Study of Hypertension in Pregnancy criteria <sup>75</sup> )                                                                                       | Unreported route, colour + pulsed wave, crossover     | <ul style="list-style-type: none"> <li>• Notch index &gt; 0.03</li> <li>• Pulsatility index &gt; 1.3</li> </ul>        | <ul style="list-style-type: none"> <li>• 0/5</li> <li>• 0/5</li> </ul>                      | <ul style="list-style-type: none"> <li>• 395/526</li> <li>• 410/526</li> </ul>                    |  |
| Albaiges et al, <sup>2</sup><br>United Kingdom                                       | 22-25         | 1 757 (3.7)                                  | Women with singleton pregnancy receiving routine antenatal care                                                                                                                                      | Blood pressure $\geq$ 140/90 mm Hg twice, at least 2 h apart; proteinuria $\geq$ 0.3 g of protein in 24-h urine collection or dipstick 0.3 g/L                                                                                                              | Unreported route, colour + pulsed wave, crossover     | <ul style="list-style-type: none"> <li>• Bilateral notching or mean pulsatility index &gt; 1.45</li> </ul>             | • 29/65                                                                                     | • 1592/1692                                                                                       |  |
|                                                                                      |               |                                              |                                                                                                                                                                                                      |                                                                                                                                                                                                                                                             |                                                       | <ul style="list-style-type: none"> <li>• Bilateral notching</li> </ul>                                                 | • 21/65                                                                                     | • 1636/1692                                                                                       |  |
|                                                                                      |               |                                              |                                                                                                                                                                                                      |                                                                                                                                                                                                                                                             |                                                       | <ul style="list-style-type: none"> <li>• Mean pulsatility index &gt; 1.45</li> </ul>                                   | • 23/65                                                                                     | • 1624/1692                                                                                       |  |
|                                                                                      |               |                                              |                                                                                                                                                                                                      |                                                                                                                                                                                                                                                             |                                                       | <ul style="list-style-type: none"> <li>• Bilateral notching and mean pulsatility index &gt; 1.45</li> </ul>            | • 15/65                                                                                     | • 1668/1692                                                                                       |  |
| Antsaklis et al, <sup>3</sup><br>Greece                                              | 19-21<br>24   | 675 (3.1)                                    | Nulliparous women. Excluded: women with multiple pregnancy, renal or cardiovascular disease, diabetes mellitus, or fetal abnormalities                                                               | Blood pressure $\geq$ 140/90 mm Hg twice, 6 h apart; proteinuria = $\geq$ 0.3 g of protein in 24-h urine collection                                                                                                                                         | Transabdominal, colour + pulsed wave, crossover       | <ul style="list-style-type: none"> <li>• Any notching</li> </ul>                                                       | • 17/21                                                                                     | • 552/654                                                                                         |  |
|                                                                                      |               |                                              |                                                                                                                                                                                                      |                                                                                                                                                                                                                                                             |                                                       | <ul style="list-style-type: none"> <li>• Bilateral notching</li> </ul>                                                 | • 10/21                                                                                     | • 607/654                                                                                         |  |
|                                                                                      |               |                                              |                                                                                                                                                                                                      |                                                                                                                                                                                                                                                             |                                                       | <ul style="list-style-type: none"> <li>• Unilateral notching</li> </ul>                                                | • 7/21                                                                                      | • 578/654                                                                                         |  |
|                                                                                      |               |                                              |                                                                                                                                                                                                      |                                                                                                                                                                                                                                                             |                                                       | <ul style="list-style-type: none"> <li>• Any notching</li> </ul>                                                       | • 16/21                                                                                     | • 602/654                                                                                         |  |
|                                                                                      |               |                                              |                                                                                                                                                                                                      |                                                                                                                                                                                                                                                             |                                                       | <ul style="list-style-type: none"> <li>• Bilateral notching</li> </ul>                                                 | • 9/21                                                                                      | • 623/654                                                                                         |  |
|                                                                                      |               |                                              |                                                                                                                                                                                                      |                                                                                                                                                                                                                                                             |                                                       | <ul style="list-style-type: none"> <li>• Unilateral notching</li> </ul>                                                | • 7/21                                                                                      | • 612/654                                                                                         |  |
| Aquilina et al, <sup>4</sup><br>United Kingdom                                       | 18-22         | 640 (5.5)                                    | Women with unspecified risk factors who had inhibin A measurement. Excluded: women with multiple pregnancy, diabetes mellitus, hypertension < 20 wk gestation, or chromosome or structural anomalies | Diastolic pressure $\geq$ 90 mm Hg twice, > 4 h apart, or $\geq$ 110 mm Hg once; proteinuria = > 0.3 g protein in 24-h urine collection or dipstick $\geq$ 2+ twice, 4 h apart; no urinary tract infection (Davey and MacGillivray criteria <sup>76</sup> ) | Transabdominal, colour + pulsed wave, unreported site | Bilateral notching and mean resistance index $\geq$ 0.55, or unilateral notching and mean resistance index $\geq$ 0.65 | 21/35                                                                                       | 563/605                                                                                           |  |
| Aquilina et al, <sup>5</sup><br>United Kingdom                                       | 18-22         | 550 (7.3)                                    | Primiparous women with unspecified risk factors receiving routine antenatal care                                                                                                                     | Diastolic pressure $\geq$ 90 mm Hg twice, > 4 h apart, or $\geq$ 110 mm Hg once; proteinuria $\geq$ 0.3 g protein in 24-h urine collection or dipstick $\geq$ 2+ twice without urinary tract infection (Davey and MacGillivray criteria <sup>76</sup> )     | Transabdominal, colour + pulsed wave, crossover       | <ul style="list-style-type: none"> <li>• Resistance index</li> <li>• A/C ratio</li> <li>• S/D ratio</li> </ul>         | <ul style="list-style-type: none"> <li>• 35/40</li> <li>• 34/40</li> <li>• 31/40</li> </ul> | <ul style="list-style-type: none"> <li>• 332/510</li> <li>• 342/510</li> <li>• 332/510</li> </ul> |  |

continued

**Appendix 3A: Patients at low risk or unspecified risk of pre-eclampsia (part 2 of 9)**

| Study, country                            | Gestation, wk | Total no. of patients (% with pre-eclampsia) | Patient group (study design*)                                                                                                                                                                                                                                                         | Reference standard for pre-eclampsia                                                                                                                                                                                                                                                                                                                                                                                                                                                                   | Details of index test                             | Index test cutoff point, centile or absolute threshold                                                                                                                                                          | Sensitivity, TP/(TP + FN)                                                                 | Specificity, TN/(FP + TN)                                                                               |
|-------------------------------------------|---------------|----------------------------------------------|---------------------------------------------------------------------------------------------------------------------------------------------------------------------------------------------------------------------------------------------------------------------------------------|--------------------------------------------------------------------------------------------------------------------------------------------------------------------------------------------------------------------------------------------------------------------------------------------------------------------------------------------------------------------------------------------------------------------------------------------------------------------------------------------------------|---------------------------------------------------|-----------------------------------------------------------------------------------------------------------------------------------------------------------------------------------------------------------------|-------------------------------------------------------------------------------------------|---------------------------------------------------------------------------------------------------------|
| Arenas et al, <sup>6</sup> Spain          | 20            | 319 (3.5)                                    | Women with unspecified risk factors. Excluded: those with multiple pregnancy or fetal anomalies                                                                                                                                                                                       | Blood pressure $\geq$ 140/90 mm Hg, proteinuria = $>$ 0.3 g protein in 24-h urine collection                                                                                                                                                                                                                                                                                                                                                                                                           | Transabdominal, colour + pulsed wave, crossover   | Resistance index $\geq$ 0.59                                                                                                                                                                                    | 8/11                                                                                      | 227/308                                                                                                 |
| Audibert et al, <sup>7</sup> France       | 18-26         | 2 615 (2.0)                                  | Women who had $\alpha$ -fetoprotein and human chorionic gonadotropin testing at 14-18 wk, and ultrasound screening. Excluded: women without ultrasound screening at 10-14 wk for dating, women with raised nuchal translucency, no Doppler ultrasound at 18-26 wk, delivery $<$ 24 wk | Systolic pressure $\geq$ 140 mm Hg or diastolic pressure $\geq$ 90 mm Hg twice; proteinuria = $>$ 0.3 g protein in 24-h urine collection or dipstick 2+ (also definition for severe pre-eclampsia)                                                                                                                                                                                                                                                                                                     | Unreported route, type and site                   | <ul style="list-style-type: none"> <li>• Bilateral notching</li> <li>• Unilateral notching</li> </ul>                                                                                                           | <ul style="list-style-type: none"> <li>• 11/51</li> <li>• 20/51</li> </ul>                | <ul style="list-style-type: none"> <li>• 2460/2564</li> <li>• 2265/2564</li> </ul>                      |
| Ay et al, <sup>8</sup> Turkey             | 24-26         | 178 (7.9)                                    | Women attending for Down syndrome serum screening. Excluded: women with multiple pregnancy, hypertension $<$ 26 wk, diabetes mellitus, fetal anomalies, previous pre-eclampsia                                                                                                        | Blood pressure $\geq$ 140/90 mm Hg $>$ 20 wk; proteinuria = $\geq$ 0.3 g protein in 24-h urine collection                                                                                                                                                                                                                                                                                                                                                                                              | Transabdominal, unreported type, crossover        | <ul style="list-style-type: none"> <li>• Any notching</li> <li>• Any notching or high resistance index</li> </ul>                                                                                               | <ul style="list-style-type: none"> <li>• 12/14</li> <li>• 12/14</li> </ul>                | <ul style="list-style-type: none"> <li>• 160/164</li> <li>• 142/164</li> </ul>                          |
| Bassim et al, <sup>9</sup> Germany        | 20-24         | 490 (2.9)                                    | Routine screening                                                                                                                                                                                                                                                                     | Systolic pressure $\geq$ 140 mm Hg or diastolic pressure $\geq$ 90 mm Hg twice, 6 h apart; proteinuria = $\geq$ 0.3 g protein in 24-h urine collection                                                                                                                                                                                                                                                                                                                                                 | Unreported route, colour + pulsed wave, crossover | Bilateral notching                                                                                                                                                                                              | 5/14                                                                                      | 445/476                                                                                                 |
| Bower et al, <sup>10</sup> United Kingdom | 18-22         | 2 058 (0.3)                                  | Women with unspecified risk factors. Excluded: women with multiple pregnancy, gestational age outside study limits, fetal anomalies                                                                                                                                                   | <p>Mild pre-eclampsia: blood pressure elevated by <math>&lt;</math> 30/25 mm Hg; proteinuria = dipstick 1+</p> <p>Moderate pre-eclampsia: blood pressure elevated by <math>&lt;</math> 30/25 mm Hg; proteinuria = dipstick <math>\geq</math> 2+</p> <p>Severe pre-eclampsia: diastolic pressure <math>\geq</math> 110 mm Hg and increase in blood pressure <math>\geq</math> 30/25 mm Hg; proteinuria = dipstick <math>\geq</math> 2+, or <math>\geq</math> 0.5 g protein in 24-h urine collection</p> | Transabdominal, colour wave, crossover            | <p>Resistance index <math>&gt;</math> 95th centile or any notching</p> <ul style="list-style-type: none"> <li>• Mild pre-eclampsia</li> <li>• Moderate pre-eclampsia</li> <li>• Severe pre-eclampsia</li> </ul> | <ul style="list-style-type: none"> <li>• 2/7</li> <li>• 14/16</li> <li>• 23/29</li> </ul> | <ul style="list-style-type: none"> <li>• 1724/2051</li> <li>• 1727/2051</li> <li>• 1723/2051</li> </ul> |

*continued*

**Appendix 3A: Patients at low risk or unspecified risk of pre-eclampsia (part 3 of 9)**

| Study, country                                  | Gestation, wk  | Total no. of patients (% with pre-eclampsia) | Patient group (study design*)                                                                                                                                                                                                                            | Reference standard for pre-eclampsia                                                                                                                                                                                                                                                                                                                                    | Details of index test                               | Index test cutoff point, centile or absolute threshold                          | Sensitivity, TP/(TP + FN) | Specificity, TN/(FP + TN)  |
|-------------------------------------------------|----------------|----------------------------------------------|----------------------------------------------------------------------------------------------------------------------------------------------------------------------------------------------------------------------------------------------------------|-------------------------------------------------------------------------------------------------------------------------------------------------------------------------------------------------------------------------------------------------------------------------------------------------------------------------------------------------------------------------|-----------------------------------------------------|---------------------------------------------------------------------------------|---------------------------|----------------------------|
| Bower et al, <sup>11</sup><br>United Kingdom    | 18-22<br>24    | 2 058 (2.2)<br>2 026 (2.2)                   | Women with unspecified risk factors                                                                                                                                                                                                                      | Mild pre-eclampsia: blood pressure elevated by < 30/25 mm Hg; proteinuria = dipstick 1+<br>Moderate pre-eclampsia: blood pressure elevated by < 30/25 mm Hg; proteinuria = dipstick ≥ 2+<br>Severe pre-eclampsia: diastolic pressure ≥ 110 mm Hg and increase in blood pressure ≥ 30/25 mm Hg; proteinuria = dipstick ≥ 2+, or ≥ 0.5 g protein in 24-h urine collection | Transabdominal, colour wave, crossover              | Unilateral notching<br>• Gestation 18-22 wk<br>• Gestation 24 wk                | • 37/45<br>• 35/45        | • 1749/2013<br>• 1902/1981 |
| Caforio et al, <sup>12</sup> Italy              | 18-20<br>22-24 | 530 (0.6)                                    | Healthy nulliparous women. Excluded: women with multiple pregnancy, fetal anomalies, chromosomal abnormalities, infections, Rhesus isoimmunization, nonimmune hydrops, preterm prelabour rupture of membranes, intrauterine stillbirth, delivery < 26 wk | Davey and McGillivray criteria <sup>76</sup>                                                                                                                                                                                                                                                                                                                            | Unreported route, colour + pulsed wave, crossover   | Resistance index > 90th centile<br>• Gestation 18-20 wk<br>• Gestation 22-24 wk | • 3/3<br>• 3/3            | • 369/527<br>• 395/527     |
| Campbell et al, <sup>13</sup><br>United Kingdom | 19-21<br>24-26 | 264 (4.9)                                    | Not reported                                                                                                                                                                                                                                             | Blood pressure ≥ 140/90 mm Hg at least twice, 4 h apart; proteinuria = ≥ 0.3 g protein in 24-h urine collection or dipstick ≥ 1+                                                                                                                                                                                                                                        | Unreported route and site, colour + continuous wave | Any notching or RI > 0.6<br>• Gestation 19-21 wk<br>• Gestation 24-26 wk        | • 13/13<br>• 13/13        | • 99/251<br>• 173/251      |
| Carbillon et al, <sup>14</sup><br>France        | 12-14<br>22-24 | 243 (4.9)                                    | Women receiving routine ultrasound screening                                                                                                                                                                                                             | Blood pressure ≥ 140/90 mm Hg twice, 4 h apart; proteinuria = ≥ 0.3 g protein in 24-h urine collection or dipstick 1+                                                                                                                                                                                                                                                   | Transabdominal, unreported type, ascending branch   | • Any notching (v. no notching)<br>• Bilateral notching                         | • 10/12<br>• 5/12         | • 102/231<br>• 215/231     |
| Driul et al, <sup>15</sup> Italy                | 24             | 840 (1.2)                                    | Not reported                                                                                                                                                                                                                                             | Not specified                                                                                                                                                                                                                                                                                                                                                           | Unreported route, colour, crossover                 | Monolateral notching or resistance index > 0.60                                 | 4/10                      | 723/830                    |
| Frusca et al, <sup>16</sup> Italy               | 24             | 419 (1.9)                                    | Nulliparous women without risk factors for pre-eclampsia. Excluded: women with chronic hypertension, diabetes mellitus or autoimmune disease                                                                                                             | Blood pressure > 140/90 mm Hg twice, 4 h apart; proteinuria = > 0.3 g protein in 24-h urine collection (Davey and MacGillivray criteria <sup>76</sup> )                                                                                                                                                                                                                 | Unreported route, colour + pulsed wave, crossover   | • Resistance index > 0.58<br>• Resistance index > 0.58 and notching             | • 4/8<br>• 4/4            | • 379/411<br>• 18/32       |

*continued*

**Appendix 3A: Patients at low risk or unspecified risk of pre-eclampsia (part 4 of 9)**

| Study, country                                 | Gestation, wk | Total no. of patients (% with pre-eclampsia) | Patient group (study design*)                                                                                                                                                         | Reference standard for pre-eclampsia                                                                                                                                                              | Details of index test                             | Index test cutoff point, centile or absolute threshold                                                                                                 | Sensitivity, TP/(TP + FN) | Specificity, TN/(FP + TN) |
|------------------------------------------------|---------------|----------------------------------------------|---------------------------------------------------------------------------------------------------------------------------------------------------------------------------------------|---------------------------------------------------------------------------------------------------------------------------------------------------------------------------------------------------|---------------------------------------------------|--------------------------------------------------------------------------------------------------------------------------------------------------------|---------------------------|---------------------------|
| Geipel et al, <sup>17</sup> Germany            | 18-24         | 114 (9.6)                                    | Women with singleton pregnancy (control group of intracytoplasmic sperm injection)                                                                                                    | Blood pressure $\geq$ 140/90 mm Hg repeated; proteinuria = $\geq$ 0.5 g protein in 24-h urine collection                                                                                          | Unreported route, colour + pulsed wave, crossover | Bilateral notching                                                                                                                                     | 8/11                      | 87/103                    |
| Gomez et al, <sup>18</sup> Spain               | 11-14         | 999 (2.2)                                    | Women with singleton pregnancy attending for routine antenatal care. Excluded: cases of fetal anomalies, and women given ASA, heparin or antihypertensive medication before enrolment | According to International Society for the Study of Hypertension in Pregnancy criteria <sup>75</sup>                                                                                              | Unreported route, colour + pulsed wave, crossover | Pulsatility index > 95th centile                                                                                                                       | 5/22                      | 929/977                   |
| Hafner et al, <sup>19</sup> Austria            | 21-23         | 2 489 (1.0)                                  | All women with singleton pregnancy                                                                                                                                                    | Blood pressure > 140/90 mm Hg twice or > 155/105 mm Hg once or need for antihypertensive therapy; proteinuria = dipstick 2+ twice or 30 mg protein in 24-h urine collection                       | Unreported route, colour + pulsed wave, crossover | Bilateral notching                                                                                                                                     | 3/25                      | 2241/2464                 |
|                                                |               |                                              |                                                                                                                                                                                       |                                                                                                                                                                                                   |                                                   | Mean pulsatility index > 90th centile                                                                                                                  | 7/25                      | 2220/2464                 |
| Harrington et al, <sup>20</sup> United Kingdom | 19-21         | 458 (9.0)                                    | Multiparous women with unspecified risk factors who had singleton pregnancy. Excluded: cases of fetal anomalies                                                                       | Diastolic pressure $\geq$ 90 mm Hg twice, 4 h apart, or $\geq$ 110 mm Hg once; proteinuria = > 0.3 g protein in 24-h urine collection or dipstick 2+ twice, 4 h apart, no urinary tract infection | Unreported route, colour + pulsed wave, crossover | Bilateral notching plus mean resistance index $\geq$ 0.55 (50th centile), or unilateral notching plus mean resistance index $\geq$ 0.65 (80th centile) | 1/2                       | 416/456                   |
| Harrington et al, <sup>21</sup> United Kingdom | 12-16         | 626 (4.8)                                    | Women with unspecified risk factors who had singleton pregnancy                                                                                                                       | Systolic pressure $\geq$ 140 mm Hg or diastolic pressure $\geq$ 90 mm Hg; proteinuria = > 0.3 g protein in 24-h urine collection                                                                  | Unreported route, colour + pulsed wave, crossover | Bilateral notching (v. unilateral or no notching)                                                                                                      | • 27/30                   | • 418/596                 |
|                                                |               |                                              |                                                                                                                                                                                       |                                                                                                                                                                                                   |                                                   | Any notching                                                                                                                                           | • 29/30                   | • 277/596                 |
| Harrington et al, <sup>22</sup> United Kingdom | 18-21         | 1 204 (3.7)                                  | Women with unspecified risk factors. Excluded: women with multiple pregnancy, fetal anomalies, women with pre-eclampsia or fetal growth restriction $\leq$ 24 wk                      | Blood pressure elevated by $\geq$ 30/25 mm Hg twice, 4 h apart, or diastolic pressure $\geq$ 110 mm Hg; proteinuria = 0.5 g in 24-h urine collection                                              | Unreported route, colour + pulsed wave, crossover | Any notching or resistance index > 95th centile                                                                                                        | • 34/44                   | • 1084/1160               |
|                                                |               |                                              |                                                                                                                                                                                       |                                                                                                                                                                                                   |                                                   | Bilateral notching                                                                                                                                     | • 24/44                   | • 1136/1160               |
|                                                |               |                                              |                                                                                                                                                                                       |                                                                                                                                                                                                   |                                                   | Unilateral notching                                                                                                                                    | • 10/44                   | • 1108/1160               |
| Harrington et al, <sup>23</sup> United Kingdom | 20            | 2 437 (2.0)                                  | Women with unspecified risk factors                                                                                                                                                   | Baseline diastolic pressure < 90 mm Hg and subsequent increase of $\geq$ 25 mm Hg twice, 4 h apart; proteinuria = > 0.5 g protein in 24-h urine collection                                        | Unreported route, colour + pulsed wave, crossover | Resistance index > 95th centile or notching                                                                                                            | 38/48                     | 2037/2389                 |

*continued*

**Appendix 3A: Patients at low risk or unspecified risk of pre-eclampsia (part 5 of 9)**

| Study, country                             | Gestation, wk | Total no. of patients (% with pre-eclampsia) | Patient group (study design*)                                                                                                           | Reference standard for pre-eclampsia                                                                                                                                                                                                                                                   | Details of index test                             | Index test cutoff point, centile or absolute threshold                                                                                                                                      | Sensitivity, TP/(TP + FN) | Specificity, TN/(FP + TN)      |
|--------------------------------------------|---------------|----------------------------------------------|-----------------------------------------------------------------------------------------------------------------------------------------|----------------------------------------------------------------------------------------------------------------------------------------------------------------------------------------------------------------------------------------------------------------------------------------|---------------------------------------------------|---------------------------------------------------------------------------------------------------------------------------------------------------------------------------------------------|---------------------------|--------------------------------|
| Kurdi et al, <sup>24</sup> United Kingdom  | 19-21         | 946 (2.2)                                    | Women with unspecified risk factors. Excluded: women with multiple pregnancy, fetal anomalies, women already receiving low-dose ASA     | Baseline diastolic pressure < 90 mm Hg and subsequent increase of $\geq$ 25 mm Hg; if baseline diastolic pressure $\geq$ 90 mm Hg, then increase of 15 mm Hg; proteinuria = dipstick $\geq$ 1+, no urinary tract infection                                                             | Unreported route, colour + pulsed wave, crossover | • Bilateral notching plus mean resistance index > 0.55 (50th centile) or unilateral notching plus mean resistance index > 0.65 (90th centile) or mean resistance index > 0.7 (95th centile) | • 15/21                   | • 724/925                      |
|                                            |               |                                              |                                                                                                                                         |                                                                                                                                                                                                                                                                                        |                                                   | • Bilateral notching                                                                                                                                                                        | • 13/21                   | • 821/925                      |
| Madazli et al, <sup>25</sup> Turkey        | 21-26         | 122 (11.5)                                   | Normotensive women                                                                                                                      | Blood pressure $\geq$ 140/90 mm Hg twice, 6 h apart; proteinuria = $\geq$ 0.3 g protein in 24-h urine collection<br><br>Severe pre-eclampsia: blood pressure $\geq$ 160/110 mm Hg twice, 6 h apart; proteinuria = dipstick 3+, oliguria, other signs and symptoms                      | Unreported route, colour + pulsed wave, crossover | • Mean S/D ratio > 2.6 (2 SD)<br><br>• Mean S/D ratio > 2.6 (2 SD) – severe pre-eclampsia                                                                                                   | • 10/14<br><br>• 5/5      | • 84/108<br><br>• 8/117        |
| Marchesoni et al, <sup>26</sup> Italy      | 20, 24        | 900 (2.9)                                    | Women with unspecified risk factors                                                                                                     | Blood pressure > 140/90 mm Hg; proteinuria = > 0.3 g protein in 24-h urine collection                                                                                                                                                                                                  | Unreported route, colour + pulsed wave, crossover | • Bilateral notching<br><br>• Any notching                                                                                                                                                  | • 16/26<br><br>• 20/26    | • 830/874<br><br>• 723/874     |
| Martin et al, <sup>27</sup> United Kingdom | 11-14         | 3 045 (2.1)                                  | Women receiving routine antenatal care                                                                                                  | Diastolic pressure $\geq$ 90 mm Hg twice > 4 h apart, proteinuria $\geq$ 0.3 g protein in 24-h urine collection or dipstick $\geq$ 2+ twice midstream urine if no 24-h collection available (International Society for the Study of Hypertension in Pregnancy criteria <sup>29</sup> ) | Unreported route, colour + pulsed wave, crossover | Pulsatility index > 2.35 (95th centile)                                                                                                                                                     | 17/63                     | 2844/3099                      |
| Mires et al, <sup>28</sup> United Kingdom  | 18-20         | 6 579 (5.5)                                  | All women with singleton pregnancy                                                                                                      | ICD-9 classification                                                                                                                                                                                                                                                                   | Unreported route, colour + pulsed wave, crossover | Bilateral notching                                                                                                                                                                          | • 23/363<br><br>• 8/363   | • 6131/6216<br><br>• 6192/6216 |
|                                            | 22-24         |                                              |                                                                                                                                         |                                                                                                                                                                                                                                                                                        |                                                   | • Gestation 18-20 wk<br><br>• Gestation 22-24 wk                                                                                                                                            |                           |                                |
| Morris et al, <sup>29</sup> Australia      | 18            | 768 (4.7)                                    | All nulliparous women, 102 women with abnormal Doppler result randomly assigned to receive ASA or placebo (randomized controlled trial) | Blood pressure > 140/90 mm Hg with rise in diastolic pressure $\geq$ 15 mm Hg twice 6 h apart, proteinuria dipstick 1+ twice 6 h apart or hyperuricemia                                                                                                                                | Unreported route, colour + pulsed wave, crossover | S/D > 3.3 (+ 2 SD) or unilateral notching + S/D > 3.0 (90th centile)                                                                                                                        | 8/36                      | 665/732                        |

*continued*

**Appendix 3A: Patients at low risk or unspecified risk of pre-eclampsia (part 6 of 9)**

| Study, country                                                                | Gestation, wk | Total no. of patients (% with pre-eclampsia) | Patient group (study design*)                                                                                                                                                                                                                                                                                                                          | Reference standard for pre-eclampsia                                                                                                                                                                                                  | Details of index test                             | Index test cutoff point, centile or absolute threshold                                                                                                                                                                                                                                                                                                  | Sensitivity, TP/(TP + FN)                                                                                                                                | Specificity, TN/(FP + TN)                                                                                                                                                     |
|-------------------------------------------------------------------------------|---------------|----------------------------------------------|--------------------------------------------------------------------------------------------------------------------------------------------------------------------------------------------------------------------------------------------------------------------------------------------------------------------------------------------------------|---------------------------------------------------------------------------------------------------------------------------------------------------------------------------------------------------------------------------------------|---------------------------------------------------|---------------------------------------------------------------------------------------------------------------------------------------------------------------------------------------------------------------------------------------------------------------------------------------------------------------------------------------------------------|----------------------------------------------------------------------------------------------------------------------------------------------------------|-------------------------------------------------------------------------------------------------------------------------------------------------------------------------------|
| Nicolaides et al, <sup>30</sup> United Kingdom                                | 11-13.6       | 433 (2.3)                                    | Women being screened for Down syndrome (nested case-control study)                                                                                                                                                                                                                                                                                     | According to International Society for the Study of Hypertension in Pregnancy criteria <sup>75</sup>                                                                                                                                  | Unreported route, colour + pulsed wave, crossover | <ul style="list-style-type: none"> <li>• Pulsatility index: 90% detection rate</li> <li>• Pulsatility index: 10% false-positive rate</li> </ul>                                                                                                                                                                                                         | <ul style="list-style-type: none"> <li>• 9/10</li> <li>• 4/10</li> </ul>                                                                                 | <ul style="list-style-type: none"> <li>• 292/423</li> <li>• 381/423</li> </ul>                                                                                                |
| North et al, <sup>31</sup> Australia                                          | 19-24         | 446 (3.4)                                    | Healthy nulliparous women. Excluded: women with renal disease or diabetes mellitus                                                                                                                                                                                                                                                                     | Blood pressure $\geq$ 140/90 mm Hg and rise in diastolic blood pressure $\geq$ 15 mm Hg twice 4 h apart, proteinuria > 0.3 g protein in 24-h urine collection or dipstick $\geq$ 2+                                                   | Unreported route, colour + pulsed wave, crossover | <ul style="list-style-type: none"> <li>• Resistance index &gt; 90th centile</li> <li>• A/C ratio &gt; 90th centile</li> <li>• Resistance index &gt; 0.53</li> <li>• Resistance index &gt; 0.54</li> <li>• Resistance index &gt; 0.55</li> <li>• Resistance index &gt; 0.56</li> <li>• Resistance index &gt; 0.57</li> </ul>                             | <ul style="list-style-type: none"> <li>• 4/15</li> <li>• 8/15</li> <li>• 8/15</li> <li>• 7/15</li> <li>• 7/15</li> <li>• 5/15</li> <li>• 4/15</li> </ul> | <ul style="list-style-type: none"> <li>• 382/431</li> <li>• 381/431</li> <li>• 341/431</li> <li>• 353/431</li> <li>• 367/431</li> <li>• 379/431</li> <li>• 387/431</li> </ul> |
| Ohkuchi et al, <sup>32</sup> Japan                                            | 16-23.9       | 288 (3.1)                                    | Healthy women with unspecified risk factors who had singleton pregnancy                                                                                                                                                                                                                                                                                | Diastolic blood pressure $\geq$ 90 mm Hg twice 4 h apart, proteinuria $\geq$ 0.3 g protein in 24-h urine collection or dipstick $\geq$ 2+ (Davey and MacGillivray criteria <sup>76</sup> )                                            | Unreported route, colour + pulsed wave, crossover | <ul style="list-style-type: none"> <li>• Any notching</li> <li>• Bilateral notching</li> <li>• Resistance index &gt; 91st centile</li> <li>• A/C ratio &gt; 91st centile</li> <li>• Notch depth index &gt; 0.14</li> </ul>                                                                                                                              | <ul style="list-style-type: none"> <li>• 6/9</li> <li>• 5/9</li> <li>• 6/9</li> <li>• 7/9</li> <li>• 6/9</li> </ul>                                      | <ul style="list-style-type: none"> <li>• 226/279</li> <li>• 256/279</li> <li>• 236/279</li> <li>• 242/279</li> <li>• 258/279</li> </ul>                                       |
| Onalan et al, <sup>33</sup> Turkey                                            | 19-21         | 406 (7.9)                                    | Women $\leq$ 40 yr who had fasting total serum homocysteine level measured. Excluded: women with multiple pregnancy, history of pre-eclampsia, hypertension < 20 wk, altered renal function, diabetes mellitus, chronic disease or fetal anomalies, and women who used folic acid > 12 wk, had special folate diet or were prescribed antifolate drugs | Diastolic blood pressure $\geq$ 90 mm Hg twice 4 h apart, proteinuria $\geq$ 0.3 g protein in 24-h urine collection, no urinary tract infection (Davey and MacGillivray criteria <sup>76</sup> )                                      | Unreported route, colour + pulsed wave, crossover | <ul style="list-style-type: none"> <li>• Bilateral notching + mean resistance index &gt; 0.55 (50th centile), all unilateral notching + mean resistance index &gt; 0.65 (80th centile), or any notching + mean resistance index &gt; 0.7 (95th centile)</li> <li>• Unilateral notching</li> <li>• Bilateral notching</li> <li>• Any notching</li> </ul> | <ul style="list-style-type: none"> <li>• 14/32</li> <li>• 8/32</li> <li>• 7/32</li> <li>• 15/32</li> </ul>                                               | <ul style="list-style-type: none"> <li>• 347/374</li> <li>• 320/374</li> <li>• 339/374</li> <li>• 285/374</li> </ul>                                                          |
| Papageorgiou et al, <sup>34</sup> United Kingdom, Brazil, Chile, South Africa | 22-24         | 16 806 (2.2)                                 | Women with unspecified risk factors who had singleton pregnancy                                                                                                                                                                                                                                                                                        | Diastolic blood pressure $\geq$ 90 mm Hg twice 4 h apart, proteinuria > 0.3 g protein in 24-h urine collection or dipstick $\geq$ 2+ twice (International Society for the Study of Hypertension in Pregnancy criteria <sup>75</sup> ) | Unreported route, colour + pulsed wave, crossover | <ul style="list-style-type: none"> <li>• Bilateral notching</li> <li>• Pulsatility index &gt; 1.44</li> <li>• Pulsatility index &gt; 1.6 or bilateral notching</li> <li>• Pulsatility index &gt; 1.38</li> </ul>                                                                                                                                        | <ul style="list-style-type: none"> <li>• 124/369</li> <li>• 168/369</li> <li>• 177/369</li> <li>• 179/369</li> </ul>                                     | <ul style="list-style-type: none"> <li>• 14 886/16 437</li> <li>• 14 960/16 437</li> <li>• 14 518/16 437</li> <li>• 14 518/16 437</li> </ul>                                  |

*continued*

**Appendix 3A: Patients at low risk or unspecified risk of pre-eclampsia (part 7 of 9)**

| Study, country                              | Gestation, wk             | Total no. of patients (% with pre-eclampsia) | Patient group (study design*)                                                                                                                                                                                                                                                            | Reference standard for pre-eclampsia                                                                                                                                                                                                              | Details of index test                             | Index test cutoff point, centile or absolute threshold                                                                  | Sensitivity, TP/(TP + FN)                                                                  | Specificity, TN/(FP + TN)                                                                                 |
|---------------------------------------------|---------------------------|----------------------------------------------|------------------------------------------------------------------------------------------------------------------------------------------------------------------------------------------------------------------------------------------------------------------------------------------|---------------------------------------------------------------------------------------------------------------------------------------------------------------------------------------------------------------------------------------------------|---------------------------------------------------|-------------------------------------------------------------------------------------------------------------------------|--------------------------------------------------------------------------------------------|-----------------------------------------------------------------------------------------------------------|
| Park et al, <sup>35</sup> Korea             | 20-24                     | 1 090 (1.7)                                  | Low-risk women. Excluded: women with multiple pregnancy, cardiovascular or renal disease, diabetes mellitus, fetal anomalies, intrauterine growth restriction, pregnancy-induced hypertension, preterm labour before performance of Doppler ultrasonography                              | Blood pressure $\geq$ 140/90 mm Hg twice 6 h apart, proteinuria > 0.3 g protein in 24-h urine collection or dipstick $\geq$ 1+                                                                                                                    | Unreported route, colour + pulsed wave, crossover | <ul style="list-style-type: none"> <li>Any notching</li> <li>Unilateral notching</li> <li>Bilateral notching</li> </ul> | <ul style="list-style-type: none"> <li>• 17/18</li> <li>• 7/18</li> <li>• 10/18</li> </ul> | <ul style="list-style-type: none"> <li>• 824/1 072</li> <li>• 883/1 072</li> <li>• 1 013/1 072</li> </ul> |
| Parra et al, <sup>36</sup> Chile            | 11-14<br>22-25            | 922 (4.4)                                    | Asymptomatic women using antioxidant vitamins                                                                                                                                                                                                                                            | Blood pressure $\geq$ 140/90 mm Hg twice 6 h apart, proteinuria > 0.3 g protein in 24-h urine collection or dipstick $\geq$ 1+ twice 6 h apart                                                                                                    | Unreported route, colour + pulsed wave, crossover | • Pulsatility index > 95th centile (2.43)                                                                               | • 8/33                                                                                     | • 846/889                                                                                                 |
|                                             |                           |                                              |                                                                                                                                                                                                                                                                                          |                                                                                                                                                                                                                                                   |                                                   | • Pulsatility index > 95th centile (1.54)                                                                               | • 16/33                                                                                    | • 851/889                                                                                                 |
| Phupong et al, <sup>37</sup> Thailand       | 22-28<br>(24.9 $\pm$ 1.9) | 322 (5.9)                                    | Healthy nulliparous and multiparous women. Excluded: women with multiple pregnancy, cardiovascular or renal disease, diabetes mellitus, fetal anomalies                                                                                                                                  | Blood pressure > 140/90 mm Hg twice 6 h apart, proteinuria $\geq$ 0.3 g protein in 24-h urine collection or dipstick 1+<br>Severe pre-eclampsia: Blood pressure $\geq$ 110 mm Hg, proteinuria 5 g protein in 24-h urine collection or dipstick 3+ | Unreported route, colour + pulsed wave, crossover | Any notching                                                                                                            | 7/19                                                                                       | 252/303                                                                                                   |
| Prefumo et al, <sup>38</sup> United Kingdom | 18-23                     | 4 149 (0.4)                                  | All singleton live births from clinical database. Excluded: fetal anomalies. Outcome measures: severe pre-eclampsia, delivery < 32 wk                                                                                                                                                    | Blood pressure > 140/90 mm Hg, proteinuria $\geq$ 0.3 g protein in 24-h urine collection or dipstick 1+ twice if no 24-h urine collection available                                                                                               | Unreported route, colour + pulsed wave, crossover | <ul style="list-style-type: none"> <li>Bilateral notching</li> <li>Any notching</li> </ul>                              | <ul style="list-style-type: none"> <li>• 11/17</li> <li>• 13/17</li> </ul>                 | <ul style="list-style-type: none"> <li>• 3933/4132</li> <li>• 3498/4132</li> </ul>                        |
| Sato et al, <sup>39</sup> Japan             | 16-23                     | 333 (4.8)                                    | Women at low risk for pre-eclampsia                                                                                                                                                                                                                                                      | Gestose Index 2                                                                                                                                                                                                                                   | Unreported route, colour + pulsed wave, crossover | • Pulsatility index $\geq$ 1.20                                                                                         | • 13/16                                                                                    | • 228/317                                                                                                 |
|                                             |                           | 341 (4.7)                                    |                                                                                                                                                                                                                                                                                          |                                                                                                                                                                                                                                                   |                                                   | • Resistance index > 0.60                                                                                               | • 12/16                                                                                    | • 219/317                                                                                                 |
| Schwarze et al, <sup>40</sup> Germany       | 19-22<br>and 23-26        | 346 (4.9)                                    | Women with singleton pregnancy. Excluded: women with multiple pregnancy, essential hypertension, diabetes mellitus, autoimmune disease, history of pre-eclampsia, intrauterine growth restriction, intrauterine stillbirth, placental abruption in previous pregnancies, fetal anomalies | Blood pressure $\geq$ 140/90 mm Hg, proteinuria $\geq$ 0.3 g protein in 24-h urine collection, no urinary tract infection                                                                                                                         | Unreported route, colour + pulsed wave, crossover | • Any resistance index > 0.58                                                                                           | • 14/17                                                                                    | • 208/329                                                                                                 |
|                                             |                           |                                              |                                                                                                                                                                                                                                                                                          |                                                                                                                                                                                                                                                   |                                                   | • Both resistance indices > 0.58                                                                                        | • 7/17                                                                                     | • 284/329                                                                                                 |
|                                             |                           |                                              |                                                                                                                                                                                                                                                                                          |                                                                                                                                                                                                                                                   |                                                   | • Any resistance index > 0.7                                                                                            | • 7/17                                                                                     | • 289/329                                                                                                 |
|                                             |                           |                                              |                                                                                                                                                                                                                                                                                          |                                                                                                                                                                                                                                                   |                                                   | • Both resistance indices > 0.7                                                                                         | • 3/17                                                                                     | • 325/329                                                                                                 |
|                                             |                           |                                              |                                                                                                                                                                                                                                                                                          |                                                                                                                                                                                                                                                   |                                                   | • Any notching                                                                                                          | • 14/17                                                                                    | • 198/329                                                                                                 |
| • Bilateral notching                        | • 8/17                    | • 273/329                                    |                                                                                                                                                                                                                                                                                          |                                                                                                                                                                                                                                                   |                                                   |                                                                                                                         |                                                                                            |                                                                                                           |

*continued*

**Appendix 3A: Patients at low risk or unspecified risk of pre-eclampsia (part 8 of 9)**

| Study, country                                 | Gestation, wk | Total no. of patients (% with pre-eclampsia) | Patient group (study design*)                                                                                                                                                                                                                                                                                                             | Reference standard for pre-eclampsia                                                                                                                  | Details of index test                             | Index test cutoff point, centile or absolute threshold | Sensitivity, TP/(TP + FN) | Specificity, TN/(FP + TN) |
|------------------------------------------------|---------------|----------------------------------------------|-------------------------------------------------------------------------------------------------------------------------------------------------------------------------------------------------------------------------------------------------------------------------------------------------------------------------------------------|-------------------------------------------------------------------------------------------------------------------------------------------------------|---------------------------------------------------|--------------------------------------------------------|---------------------------|---------------------------|
| Soutif et al, <sup>41</sup><br>France          | 21, 24        | 315 (1.3)                                    | Primiparous women.<br>Excluded: women with nephropathy, chronic hypertension, diabetes mellitus, systemic disorder, multiple pregnancy                                                                                                                                                                                                    | Systolic blood pressure $\geq$ 150 mm Hg or diastolic blood pressure $\geq$ 90 mm Hg twice, proteinuria $\geq$ 1.0 g protein in 24-h urine collection | Unreported route, colour + pulsed wave, crossover | S/D ratio > 2.6 on either side or unilateral notching  | 3/4                       | 264/311                   |
| Subtil et al, <sup>42</sup><br>France, Belgium | 22-24         | 1 170 (2.1)                                  | Women undergoing routine Doppler examination given either ASA or placebo if abnormal findings (randomized controlled trial)                                                                                                                                                                                                               | Pregnancy induced hypertension not quantified, proteinuria dipstick 2+ or protein $\geq$ 0.5 g/L in 24-h urine collection                             | Unreported route, colour + pulsed wave, crossover | Resistance index > 0.61 or any notching                | 14/24                     | 923/1146                  |
| Tranquilli et al, <sup>43</sup><br>Italy       | 24            | 75 (18.7)                                    | Normotensive primigravid women. Excluded: primigravidous women with chronic hypertension, fetal anomalies, intrauterine growth restriction                                                                                                                                                                                                | Hypertension and proteinuria not quantified                                                                                                           | Unreported route, colour + pulsed wave, crossover | Resistance index > 0.58                                | 8/14                      | 31/61                     |
| Uludag et al, <sup>44</sup><br>Turkey          | 18-20         | 80 (12.5)                                    | Women who were nonsmokers. Excluded: women with multiple pregnancy, diabetes mellitus, fetal anomalies                                                                                                                                                                                                                                    | Blood pressure > 140/90 mm Hg > 24 wk or proteinuria > 0.3 g protein in 24-h urine collection                                                         | Unreported route, colour + pulsed wave, crossover | Bilateral notching                                     | 9/10                      | 62/70                     |
| Valensise et al, <sup>46</sup><br>Italy        | 24            | 192 (4.7)                                    | Low-risk women ( $n = 104$ ): primiparous, no current or previous relevant medical history. High-risk women ( $n = 88$ ): history of pregnancy-induced hypertension, intrauterine growth restriction or intrauterine stillbirth. Excluded: women with intrauterine growth restriction detected on ultrasound screening or oligohydramnios | Gestational hypertension (Davey and MacGillivray criteria <sup>76</sup> ), proteinuria > 0.3 g protein in 24-h urine collection                       | Unreported route, colour + pulsed wave, crossover | Resistance index > 0.58                                | 8/9                       | 152/183                   |
| Valensise et al, <sup>47</sup><br>Italy        | 22 and 24     | 272 (3.3)                                    | Primigravid women. Excluded: women with history of hypertension, diabetes mellitus, systemic lupus erythematosus, pharmacologic induction of ovulation, fetal or chromosomal anomalies                                                                                                                                                    | Davey and MacGillivray criteria, <sup>76</sup> proteinuria: protein > 0.3 g/L in 24-h urine collection                                                | Unreported route, colour + pulsed wave, crossover | Resistance index > 0.58 at 24 wk                       | 8/9                       | 245/263                   |

*continued*



**Appendix 3A: Patients at low risk or unspecified risk of pre-eclampsia (part 9 of 9)**

| Study, country                            | Gestation, wk | Total no. of patients (% with pre-eclampsia) | Patient group (study design*)                                                                                                                                                                                                     | Reference standard for pre-eclampsia                                                                                                                                     | Details of index test                             | Index test cutoff point, centile or absolute threshold                                                                                                                                                                                                                                                                                                                                                                                                                                                                                                                                                                                                                                                                                          | Sensitivity, TP/(TP + FN)                                                                                                                                                                                    | Specificity, TN/(FP + TN)                                                                                                                                                                                                                                                 |
|-------------------------------------------|---------------|----------------------------------------------|-----------------------------------------------------------------------------------------------------------------------------------------------------------------------------------------------------------------------------------|--------------------------------------------------------------------------------------------------------------------------------------------------------------------------|---------------------------------------------------|-------------------------------------------------------------------------------------------------------------------------------------------------------------------------------------------------------------------------------------------------------------------------------------------------------------------------------------------------------------------------------------------------------------------------------------------------------------------------------------------------------------------------------------------------------------------------------------------------------------------------------------------------------------------------------------------------------------------------------------------------|--------------------------------------------------------------------------------------------------------------------------------------------------------------------------------------------------------------|---------------------------------------------------------------------------------------------------------------------------------------------------------------------------------------------------------------------------------------------------------------------------|
| Yu et al, <sup>48</sup><br>United Kingdom | 22-24         | 15 392 (2.0)                                 | Women with unspecified risk factors who had low-risk singleton pregnancy                                                                                                                                                          | Diastolic blood pressure $\geq$ 90 mm Hg twice 4 h apart, proteinuria $\geq$ 0.3 g protein in 24-h urine collection or dipstick 2+                                       | Unreported route, colour + pulsed wave, crossover | Pre-eclampsia overall<br><ul style="list-style-type: none"> <li>• Pulsatility index: 2% false-positive ratio</li> <li>• Pulsatility index: 5% false-positive ratio (&gt; 1.6)</li> <li>• Pulsatility index: 10% false-positive ratio</li> </ul> Pre-eclampsia < 34 wk<br><ul style="list-style-type: none"> <li>• Pulsatility index: 2% false-positive ratio</li> <li>• Pulsatility index: 5% false-positive ratio (&gt; 1.6)</li> <li>• Pulsatility index: 10% false-positive ratio</li> </ul> Pre-eclampsia > 34 wk<br><ul style="list-style-type: none"> <li>• Pulsatility index: 2% false-positive ratio</li> <li>• Pulsatility index: 5% false-positive ratio (&gt; 1.6)</li> <li>• Pulsatility index: 10% false-positive ratio</li> </ul> | <ul style="list-style-type: none"> <li>• 87/297</li> <li>• 127/297</li> <li>• 153/297</li> <li>• 43/297</li> <li>• 56/297</li> <li>• 61/297</li> <li>• 44/297</li> <li>• 74/297</li> <li>• 95/297</li> </ul> | <ul style="list-style-type: none"> <li>• 14 763/15 095</li> <li>• 14 340/15 095</li> <li>• 13 555/15 095</li> <li>• 15 014/15 095</li> <li>• 14 554/15 095</li> <li>• 13 773/15 095</li> <li>• 14 864/15 095</li> <li>• 14 409/15 095</li> <li>• 13 650/15 095</li> </ul> |
| Zimmerman et al, <sup>49</sup><br>Finland | 22-24         | 55 (10.9)                                    | High-risk women (n = 26): family or personal history of pre-eclampsia, chronic hypertension or intrauterine growth restriction or intrauterine stillbirth; 13 received ASA. Low-risk women (n = 29) (randomized controlled trial) | Blood pressure $\geq$ 145/85 mm Hg, proteinuria (not specified, dipstick testing) on $\geq$ 2 occasions 24 h apart; severe pre-eclampsia: blood pressure > 160/100 mm Hg | Unreported route, colour + pulsed wave, crossover | Bilateral notching only                                                                                                                                                                                                                                                                                                                                                                                                                                                                                                                                                                                                                                                                                                                         | 6/6                                                                                                                                                                                                          | 25/49                                                                                                                                                                                                                                                                     |

Note: A/C ratio = ratio of peak systolic to early diastolic velocity, ASA = acetylsalicylic acid, FN = false negative, FP = false positive, S/D ratio = ratio of peak systolic to late diastolic velocity, SD = standard deviation, TN = true negative, TP = true positive.  
 \*Cohort study unless stated otherwise.

**See next page for start of Appendix 3B; see end of document for references.**

**Appendix 3B: Patients at high risk for pre-eclampsia (part 1 of 6)**

| Study, country                               | Gestation, wk | Total no. of patients (% with pre-eclampsia) | Patient group (study design*)                                                                                                                                                                                  | Reference standard for pre-eclampsia                                                                                                                                                                                                                           | Details of index test                             | Index test cutoff, centile or absolute threshold                                                                                                                                                                                                                           | Sensitivity, TP/(TP + FN)                                                                                                          | Specificity, TN/(FP + TN)                                                                                                                      |
|----------------------------------------------|---------------|----------------------------------------------|----------------------------------------------------------------------------------------------------------------------------------------------------------------------------------------------------------------|----------------------------------------------------------------------------------------------------------------------------------------------------------------------------------------------------------------------------------------------------------------|---------------------------------------------------|----------------------------------------------------------------------------------------------------------------------------------------------------------------------------------------------------------------------------------------------------------------------------|------------------------------------------------------------------------------------------------------------------------------------|------------------------------------------------------------------------------------------------------------------------------------------------|
| Aardema et al, <sup>1</sup> the Netherlands  | 21-22         | 94 (7.5)                                     | Multiparous women with singleton pregnancy who had history of hypertensive disorders in previous pregnancies but no current pathology                                                                          | Diastolic blood pressure $\geq$ 90 mm Hg twice, proteinuria = dipstick $\geq$ 2+ (International Society for the Study of Hypertension in Pregnancy criteria <sup>75</sup> )                                                                                    | Unreported route, colour + pulsed wave, crossover | <ul style="list-style-type: none"> <li>• Notch index &gt; 0.03</li> <li>• Pulsatility index &gt; 1.3</li> </ul>                                                                                                                                                            | <ul style="list-style-type: none"> <li>• 1/7</li> <li>• 1/7</li> </ul>                                                             | <ul style="list-style-type: none"> <li>• 70/87</li> <li>• 59/87</li> </ul>                                                                     |
| Aardema et al, <sup>50</sup> the Netherlands | 21-22         | 94 (7.5)                                     | Women with singleton pregnancy who had history of hypertensive disorders in previous pregnancies but no current pathology                                                                                      | Diastolic blood pressure $\geq$ 90 mm Hg twice, proteinuria = dipstick $\geq$ 2+                                                                                                                                                                               | Unreported route, colour + pulsed wave, crossover | Any notching                                                                                                                                                                                                                                                               | 1/7                                                                                                                                | 70/87                                                                                                                                          |
| Alkazaleh et al, <sup>51</sup> Canada        | 19-23         | 50 (26.0)                                    | Women with $\alpha$ -fetoprotein > 2.0 multiples of the median and human chorionic gonadotropin level > 2.5 multiples of the median                                                                            | American College of Obstetricians and Gynecologists criteria <sup>77</sup>                                                                                                                                                                                     | Unreported route, colour + pulsed wave, crossover | Mean pulsatility index > 1.45                                                                                                                                                                                                                                              | 9/11                                                                                                                               | 18/37                                                                                                                                          |
| Axt-Fliedner et al, <sup>52</sup> Germany    | 19-26         | 52 (7.7)                                     | High-risk singleton pregnancies: history of pre-eclampsia, fetal growth restriction, intrauterine demise, abruption                                                                                            | Blood pressure $\geq$ 140/90 mm Hg, proteinuria $\geq$ 0.3 g protein in 24-h urine collection, no urinary tract infection                                                                                                                                      | Transabdominal, colour, crossover                 | <ul style="list-style-type: none"> <li>• Any resistance index &gt; 0.58</li> <li>• Both resistance indices &gt; 0.58</li> <li>• Any resistance index &gt; 0.7</li> <li>• Both resistance indexes &gt; 0.7</li> <li>• Bilateral notching</li> <li>• Any notching</li> </ul> | <ul style="list-style-type: none"> <li>• 2/4</li> <li>• 2/4</li> <li>• 1/4</li> <li>• 1/4</li> <li>• 1/4</li> <li>• 3/4</li> </ul> | <ul style="list-style-type: none"> <li>• 19/48</li> <li>• 36/48</li> <li>• 42/48</li> <li>• 46/48</li> <li>• 34/48</li> <li>• 23/48</li> </ul> |
| Caforio et al, <sup>12</sup> Italy           | 18-20         | 335 (12.5)                                   | Women with chronic hypertension, diabetes mellitus, autoimmune disease, systemic lupus erythematosus, renal disease; history of stillbirths, intrauterine growth restriction, pre-eclampsia, habitual abortion | Davey and MacGillivray criteria <sup>76</sup>                                                                                                                                                                                                                  | Unreported route, colour + pulsed wave, crossover | Resistance index > 90th centile                                                                                                                                                                                                                                            | 39/42                                                                                                                              | 202/301                                                                                                                                        |
| Caruso et al, <sup>53</sup> Italy            | 23-24         | 42 (21.4)                                    | Women with chronic hypertension, singleton pregnancy. Excluded: women with autoimmune disease, fetal anomalies, Rhesus isoimmunization                                                                         | Systolic blood pressure $\geq$ 140 mm Hg or diastolic blood pressure $\geq$ 90 mm Hg and exacerbation of hypertension, proteinuria > 0.3 g/L or dipstick > 1+ in 2 random samples or $\geq$ 0.3 g protein in 24-h urine collection, no urinary tract infection | Transabdominal, colour, crossover                 | Resistance index > 90th centile                                                                                                                                                                                                                                            | 9/9                                                                                                                                | 27/33                                                                                                                                          |
| Caruso et al, <sup>54</sup> Italy            | 18-24         | 28 (17.9)                                    | Women with antiphospholipid syndrome                                                                                                                                                                           | Davey and MacGillivray criteria <sup>76</sup>                                                                                                                                                                                                                  | Transabdominal, colour, crossover                 | Resistance index > 90th centile                                                                                                                                                                                                                                            | 4/5                                                                                                                                | 18/23                                                                                                                                          |

*continued*

**Appendix 3B: Patients at high risk for pre-eclampsia (part 2 of 6)**

| Study, country                           | Gestation, wk | Total no. of patients (% with pre-eclampsia) | Patient group (study design*)                                                                                                                                                                                                                                                                                                                                                                                                                           | Reference standard for pre-eclampsia                                                                                                                                                                                                                                                                                                                                                                                                                         | Details of index test                             | Index test cutoff, centile or absolute threshold                                                                                                                                                                                                                                                                                                                                                                                                                                       | Sensitivity, TP/(TP + FN)                                                                                                                                                    | Specificity, TN/(FP + TN)                                                                                                                                                       |
|------------------------------------------|---------------|----------------------------------------------|---------------------------------------------------------------------------------------------------------------------------------------------------------------------------------------------------------------------------------------------------------------------------------------------------------------------------------------------------------------------------------------------------------------------------------------------------------|--------------------------------------------------------------------------------------------------------------------------------------------------------------------------------------------------------------------------------------------------------------------------------------------------------------------------------------------------------------------------------------------------------------------------------------------------------------|---------------------------------------------------|----------------------------------------------------------------------------------------------------------------------------------------------------------------------------------------------------------------------------------------------------------------------------------------------------------------------------------------------------------------------------------------------------------------------------------------------------------------------------------------|------------------------------------------------------------------------------------------------------------------------------------------------------------------------------|---------------------------------------------------------------------------------------------------------------------------------------------------------------------------------|
| Chan et al, <sup>55</sup> Hong Kong      | 20            | 334 (6.9)                                    | High-risk women (age > 35 yr, poor obstetric history, medical complications of pregnancy, low pre-pregnancy weight, single mother, smoker > 10 cigarettes/d)                                                                                                                                                                                                                                                                                            | Blood pressure $\geq$ 140/90 mm Hg twice, 6 h apart; proteinuria > 0.3 g protein in 24-h urine collection or dipstick $\geq$ 2+                                                                                                                                                                                                                                                                                                                              | Unreported route and site, colour Doppler         | <ul style="list-style-type: none"> <li>Resistance index &gt; 95th centile</li> <li>Resistance index &gt; 90th centile + bilateral notching</li> </ul>                                                                                                                                                                                                                                                                                                                                  | <ul style="list-style-type: none"> <li>4/23</li> <li>5/23</li> </ul>                                                                                                         | <ul style="list-style-type: none"> <li>297/311</li> <li>301/311</li> </ul>                                                                                                      |
| Coleman et al, <sup>56</sup> New Zealand | 22-24         | 116 (26.7)                                   | Women with essential or secondary hypertension, renal disease, systemic lupus erythematosus, antiphospholipid syndrome, previous pre-eclampsia or placental abruption. Excluded: Women with multiple pregnancy, fetal abnormalities                                                                                                                                                                                                                     | <p>Blood pressure <math>\geq</math> 140/90 mm Hg with rise in diastolic blood pressure &gt; 15 mm Hg twice, 4 h apart; proteinuria <math>\geq</math> 0.3 g protein in 24-h urine collection or dipstick 2+</p> <p>Superimposed pre-eclampsia: Blood pressure &gt; 140/90 mm Hg with rise in systolic blood pressure <math>\geq</math> 30 or diastolic blood pressure <math>\geq</math> 15 mm Hg with new proteinuria or doubling of existing proteinuria</p> | Transabdominal, colour, crossover                 | <ul style="list-style-type: none"> <li>Any resistance index &gt; 0.58</li> <li>Both resistance indexes &gt; 0.58</li> <li>Any resistance index <math>\geq</math> 0.7</li> <li>Both resistance indices <math>\geq</math> 0.7</li> <li>Any notching</li> <li>Bilateral notching</li> <li>Resistance index &gt; 0.58 and any notching</li> <li>Resistance index <math>\geq</math> 0.7 and any notching</li> <li>Both resistance indices <math>\geq</math> 0.7 and any notching</li> </ul> | <ul style="list-style-type: none"> <li>29/31</li> <li>13/31</li> <li>16/31</li> <li>7/31</li> <li>20/31</li> <li>9/31</li> <li>20/31</li> <li>13/31</li> <li>6/31</li> </ul> | <ul style="list-style-type: none"> <li>36/84</li> <li>65/84</li> <li>60/84</li> <li>79/84</li> <li>60/84</li> <li>72/84</li> <li>60/84</li> <li>66/84</li> <li>79/84</li> </ul> |
| Driul et al, <sup>57</sup> Italy         | 20            | 103 (37.9)                                   | Women with chronic hypertension, diabetes mellitus, previous fetal death, intrauterine growth restriction, multiple pregnancy, hydrops fetalis, previous pre-eclampsia, vascular and connective tissue disease, nephropathy, antiphospholipid syndrome, obesity, African-Italian race. All negative for lupus anticoagulant and anticardiolipin antibodies, all used folic acid, no family or personal history of thromboembolic disease (case-control) | American College of Obstetricians and Gynecologists criteria <sup>77</sup>                                                                                                                                                                                                                                                                                                                                                                                   | Unreported route, colour + pulsed wave, crossover | Resistance index > 0.58 and bilateral notching                                                                                                                                                                                                                                                                                                                                                                                                                                         | 23/39                                                                                                                                                                        | 60/64                                                                                                                                                                           |

*continued*

**Appendix 3B: Patients at high risk for pre-eclampsia (part 3 of 6)**

| Study, country                         | Gestation, wk | Total no. of patients (% with pre-eclampsia) | Patient group (study design*)                                                                                                                            | Reference standard for pre-eclampsia                                                                                                                                                                                                                              | Details of index test                             | Index test cutoff, centile or absolute threshold                                                                                                                                                                                                                                                                                  | Sensitivity, TP/(TP + FN)                                                                                      | Specificity, TN/(FP + TN)                                                                                                     |
|----------------------------------------|---------------|----------------------------------------------|----------------------------------------------------------------------------------------------------------------------------------------------------------|-------------------------------------------------------------------------------------------------------------------------------------------------------------------------------------------------------------------------------------------------------------------|---------------------------------------------------|-----------------------------------------------------------------------------------------------------------------------------------------------------------------------------------------------------------------------------------------------------------------------------------------------------------------------------------|----------------------------------------------------------------------------------------------------------------|-------------------------------------------------------------------------------------------------------------------------------|
| Ferrier et al, <sup>58</sup> Australia | 19-24         | 51 (7.8)                                     | Women with renal disease other than diabetic nephropathy                                                                                                 | Blood pressure $\geq$ 140/90 mm Hg and rise in diastolic blood pressure $\geq$ 15 mm Hg twice, 4 h apart; proteinuria > 0.3 g protein in 24-h urine collection or doubling of protein excretion in 24-h urinary collection if proteinuria already present < 20 wk | Transabdominal, colour, crossover                 | <ul style="list-style-type: none"> <li>Resistance index &gt; 90th centile</li> <li>A/C ratio &gt; 90th centile</li> </ul>                                                                                                                                                                                                         | <ul style="list-style-type: none"> <li>2/4</li> <li>2/4</li> </ul>                                             | <ul style="list-style-type: none"> <li>35/47</li> <li>37/47</li> </ul>                                                        |
| Frusca et al, <sup>59</sup> Italy      | 24-25         | 78 (3.9)                                     | Women with chronic hypertension. Excluded: women with multiple pregnancy, fetal anomalies                                                                | Superimposed pre-eclampsia: aggravated hypertension (rise in diastolic blood pressure > 15 mm Hg) and proteinuria > 0.3 g protein in 24-h urine collection                                                                                                        | Unreported route, colour + pulsed wave, crossover | <ul style="list-style-type: none"> <li>Resistance index &gt; 2 SD</li> <li>Any notching</li> <li>Bilateral notching</li> </ul>                                                                                                                                                                                                    | <ul style="list-style-type: none"> <li>3/3</li> <li>3/3</li> <li>3/3</li> </ul>                                | <ul style="list-style-type: none"> <li>53/75</li> <li>50/75</li> <li>65/75</li> </ul>                                         |
| Frusca et al, <sup>60</sup> Italy      | 24            | 56 (5.4)                                     | Women with previous history of pre-eclampsia and who had normal blood pressure after that pregnancy                                                      | Diastolic blood pressure $\geq$ 90 mm Hg twice, 4 h apart, in third trimester, proteinuria > 0.3 g protein in 24-h urine collection, no urinary tract infection                                                                                                   | Unreported route, colour + pulsed wave, crossover | <ul style="list-style-type: none"> <li>Resistance index &gt; 0.58</li> <li>Any notching</li> <li>Bilateral notching and mean resistance index &gt; 0.58</li> </ul>                                                                                                                                                                | <ul style="list-style-type: none"> <li>3/3</li> <li>3/3</li> <li>1/3</li> </ul>                                | <ul style="list-style-type: none"> <li>32/53</li> <li>35/53</li> <li>46/53</li> </ul>                                         |
| Geipel et al, <sup>61</sup> Germany    | 18-24         | 256 (8.6)                                    | Women with dichorionic twins. Excluded: women with fetal malformation, preterm prelabour rupture of membranes, unclear chorionicity, unavailable outcome | Blood pressure $\geq$ 140/90 mm Hg repeated, proteinuria $\geq$ 0.3 g protein in 24-h urine collection                                                                                                                                                            | Unreported route, colour + pulsed wave, crossover | <ul style="list-style-type: none"> <li>Unilateral or bilateral notching: twin reference</li> <li>Resistance index &gt; 95th centile: singleton reference</li> <li>Resistance index &gt; 95th centile: twin reference</li> <li>Resistance index &gt; 95th and notching: twin reference</li> <li>Bilateral notching only</li> </ul> | <ul style="list-style-type: none"> <li>9/22</li> <li>4/22</li> <li>8/22</li> <li>7/22</li> <li>4/22</li> </ul> | <ul style="list-style-type: none"> <li>201/234</li> <li>230/234</li> <li>206/234</li> <li>217/234</li> <li>224/234</li> </ul> |
| Geipel et al, <sup>17</sup> Germany    | 18-24         | 114 (5.3)                                    | Patients who underwent intracytoplasmic sperm injection, women with singleton pregnancy                                                                  | Blood pressure $\geq$ 140/90 mm Hg repeated, proteinuria $\geq$ 0.5 g protein in 24-h urine collection                                                                                                                                                            | Unreported route, colour + pulsed wave, crossover | Bilateral notching                                                                                                                                                                                                                                                                                                                | 6/6                                                                                                            | 87/108                                                                                                                        |
| Geipel et al, <sup>17</sup> Germany    | 18-24         | 32 (3.2)                                     | Patients who underwent intracytoplasmic sperm injection, women with twin pregnancy                                                                       | Blood pressure $\geq$ 140/90 mm Hg repeated, proteinuria $\geq$ 0.5 g protein in 24-h urine collection                                                                                                                                                            | Unreported route, colour + pulsed wave, crossover | Bilateral notching + mean resistance index > 0.55 or unilateral notching + mean resistance index > 0.65 or no notching + resistance index > 0.70                                                                                                                                                                                  | 0/1                                                                                                            | 23/31                                                                                                                         |

*continued*

**Appendix 3B: Patients at high risk for pre-eclampsia (part 4 of 6)**

| Study, country                                  | Gestation, wk  | Total no. of patients (% with pre-eclampsia) | Patient group (study design*)                                                                                                                                                                                                                                          | Reference standard for pre-eclampsia                                                                                                                                                            | Details of index test                             | Index test cutoff, centile or absolute threshold                                                                                                                                                           | Sensitivity, TP/(TP + FN)                                                  | Specificity, TN/(FP + TN)                                                  |
|-------------------------------------------------|----------------|----------------------------------------------|------------------------------------------------------------------------------------------------------------------------------------------------------------------------------------------------------------------------------------------------------------------------|-------------------------------------------------------------------------------------------------------------------------------------------------------------------------------------------------|---------------------------------------------------|------------------------------------------------------------------------------------------------------------------------------------------------------------------------------------------------------------|----------------------------------------------------------------------------|----------------------------------------------------------------------------|
| Geipel et al, <sup>17</sup> Germany             | 18-24          | 32 (6.3)                                     | Women with twin pregnancy (control group for patients who underwent intracytoplasmic sperm injection)                                                                                                                                                                  | Blood pressure $\geq$ 140/90 mm Hg repeated, proteinuria $\geq$ 0.5 g protein in 24-h urine collection                                                                                          | Unreported route, colour + pulsed wave, crossover | Bilateral notching + mean resistance index $>$ 0.55 or unilateral notching + mean resistance index $>$ 0.65 or no notching + resistance index $>$ 0.70 (low risk)                                          | 2/2                                                                        | 24/30                                                                      |
| Haddad et al, <sup>62</sup> France              | 23.8 $\pm$ 2.6 | 48 (10.4)                                    | Women given ASA therapy because of poor previous outcome, pre-eclampsia, eclampsia, HELLP syndrome, abruption, intrauterine growth restriction, intrauterine stillbirth                                                                                                | Systolic blood pressure $\geq$ 140 or diastolic blood pressure $\geq$ 90 mm Hg, proteinuria $\geq$ 0.5 g protein in 24-h urine collection                                                       | Unreported route, colour + pulsed wave, crossover | D/S ratio $<$ 10th centile or unilateral notching                                                                                                                                                          | 5/5                                                                        | 22/43                                                                      |
| Harrington et al, <sup>20</sup> United Kingdom  | 19-21          | 170 (28.8)                                   | Women with chronic hypertension, previous pre-eclampsia, gestational hypertension, intrauterine growth restriction, preterm labour, abruption, intrauterine stillbirth, diabetes mellitus, renal disease, other medical diseases. Excluded: women with fetal anomalies | Diastolic blood pressure $\geq$ 90 mm Hg twice, 4 h apart, or $\geq$ 110 mm Hg once; proteinuria $>$ 0.3 g in 24-h urine collection or dipstick 2+ twice, 4 h apart; no urinary tract infection | Unreported route, colour + pulsed wave, crossover | Bilateral notching + mean resistance index $\geq$ 0.55 (50th centile) or unilateral notching + mean resistance index $\geq$ 0.65 (80th centile)                                                            | 19/20                                                                      | 120/150                                                                    |
| Hershkovitz et al, <sup>63</sup> United Kingdom | 20-24          | 88 (44.3)                                    | Women with chronic hypertension, history of severe pre-eclampsia, thrombophilia                                                                                                                                                                                        | Blood pressure $\geq$ 140/90 mm Hg twice, 4 h apart, $>$ 20 wk, rise in diastolic blood pressure $\geq$ 20 mm Hg, proteinuria $\geq$ 0.3 g protein in 24-h urine collection or dipstick 2+      | Unreported route, colour + pulsed wave, crossover | <ul style="list-style-type: none"> <li>Bilateral abnormal Doppler (PI <math>&gt;</math> 95th centile or notching)</li> <li>Any abnormal Doppler (PI <math>&gt;</math> 95th centile or notching)</li> </ul> | <ul style="list-style-type: none"> <li>• 12/39</li> <li>• 21/39</li> </ul> | <ul style="list-style-type: none"> <li>• 39/49</li> <li>• 37/49</li> </ul> |
| Konchak et al, <sup>64</sup> United States      | 17-22          | 103 (5.8)                                    | Women with $\alpha$ -fetoprotein $>$ 2.0 multiples of the median twice or $>$ 2.5 multiples of the median once. Women with singleton pregnancy, no fetal anomalies, normal amniotic fluid volume                                                                       | Not specified                                                                                                                                                                                   | Unreported route, colour + pulsed wave, crossover | <ul style="list-style-type: none"> <li>Unilateral notching</li> <li>Resistance index <math>&gt;</math> 95th centile</li> </ul>                                                                             | <ul style="list-style-type: none"> <li>• 5/6</li> <li>• 5/6</li> </ul>     | <ul style="list-style-type: none"> <li>• 93/97</li> <li>• 91/97</li> </ul> |
| Le Thi Huong et al, <sup>65</sup> France        | 2nd trimester  | 100 (7.0)                                    | Women with systemic lupus erythematosus, antiphospholipid syndrome                                                                                                                                                                                                     | Diastolic blood pressure $>$ 90 mm Hg, proteinuria $\geq$ 0.5 g protein in 24-h urine collection                                                                                                | Unreported route, colour + pulsed wave, crossover | Any notching                                                                                                                                                                                               | 5/7                                                                        | 80/93                                                                      |

*continued*

**Appendix 3B: Patients at high risk for pre-eclampsia (part 5 of 6)**

| Study, country                              | Gestation, wk | Total no. of patients (% with pre-eclampsia) | Patient group (study design*)                                                                                                                                                                                                                                                                                               | Reference standard for pre-eclampsia                                                                                                                                                                                                                                   | Details of index test                             | Index test cutoff, centile or absolute threshold                                                                                                                                                                                                                                                                                                                                                                                   | Sensitivity, TP/(TP + FN)                                                                                                                  | Specificity, TN/(FP + TN)                                                                                                                                |
|---------------------------------------------|---------------|----------------------------------------------|-----------------------------------------------------------------------------------------------------------------------------------------------------------------------------------------------------------------------------------------------------------------------------------------------------------------------------|------------------------------------------------------------------------------------------------------------------------------------------------------------------------------------------------------------------------------------------------------------------------|---------------------------------------------------|------------------------------------------------------------------------------------------------------------------------------------------------------------------------------------------------------------------------------------------------------------------------------------------------------------------------------------------------------------------------------------------------------------------------------------|--------------------------------------------------------------------------------------------------------------------------------------------|----------------------------------------------------------------------------------------------------------------------------------------------------------|
| Nagtegaal et al, <sup>66</sup> Australia    | 18-22         | 182 (24.7)                                   | Women with previous pre-eclampsia, intrauterine growth restriction, placental abruption, recurrent miscarriages, unexplained stillbirth, chronic hypertension, type 1 diabetes mellitus, thrombophilia, family history of pre-eclampsia                                                                                     | According to ASSHP criteria <sup>78</sup>                                                                                                                                                                                                                              | Unreported route, colour + pulsed wave, crossover | <ul style="list-style-type: none"> <li>• Resistance index <math>\geq 0.58</math></li> <li>• Resistance index <math>\geq 0.58</math> + any notching</li> <li>• Resistance index <math>\geq 0.58</math> + bilateral notching</li> <li>• Resistance index <math>\geq 0.65</math></li> <li>• Resistance index <math>\geq 0.65</math> + any notching</li> <li>• Resistance index <math>\geq 0.65</math> + bilateral notching</li> </ul> | <ul style="list-style-type: none"> <li>• 31/45</li> <li>• 7/45</li> <li>• 2/45</li> <li>• 26/45</li> <li>• 6/45</li> <li>• 2/45</li> </ul> | <ul style="list-style-type: none"> <li>• 43/137</li> <li>• 104/137</li> <li>• 125/137</li> <li>• 57/137</li> <li>• 104/137</li> <li>• 125/137</li> </ul> |
| Parretti et al, <sup>67</sup> Italy         | 24            | 144 (25.0)                                   | Normotensive, white women with risk factors (previous pre-eclampsia, stillbirth, placental abruption, intrauterine growth restriction). Excluded: smokers, women with cardiovascular or renal disease, diabetes mellitus, multiple pregnancy, and fetal chromosomal abnormalities, and women receiving low-dose ASA therapy | Blood pressure > 140/90 mm Hg twice within 24 h, proteinuria > 0.3 g protein in 24-h urine collection, no urinary tract infection, previously normotensive and nonproteinuric                                                                                          | Unreported route, colour + pulsed wave, crossover | Mean resistance index $\geq 0.58$                                                                                                                                                                                                                                                                                                                                                                                                  | 28/36                                                                                                                                      | 73/108                                                                                                                                                   |
| Pattinson et al, <sup>68</sup> South Africa | 16-28         | 53 (13.2)                                    | Women at high risk of complications                                                                                                                                                                                                                                                                                         | Davey and MacGillivray criteria <sup>76</sup>                                                                                                                                                                                                                          | Unreported route, colour + pulsed wave, crossover | Resistance index > 0.58                                                                                                                                                                                                                                                                                                                                                                                                            | 6/7                                                                                                                                        | 32/46                                                                                                                                                    |
| Rizzo et al, <sup>69</sup> Italy            | 20-24         | 64 (25.0)                                    | Women with twin pregnancy, certain gestational age (first trimester crown-rump length or second trimester biparietal diameter), successful Doppler ultrasonography of both uterine arteries, dichorionicity (prenatally and postnatally confirmed)                                                                          | Diastolic blood pressure $\geq 90$ mm Hg twice, 4 h apart, in previously normotensive and nonproteinuric or diastolic blood pressure $\geq 110$ mm Hg once, proteinuria $\geq 0.3$ g protein in 24-h urine collection (Davey and MacGillivray criteria <sup>76</sup> ) | Unreported route, colour + pulsed wave, crossover | Mean resistance index (no cutoff)                                                                                                                                                                                                                                                                                                                                                                                                  | 6/16                                                                                                                                       | 32/48                                                                                                                                                    |

*continued*

**Appendix 3B: Patients at high risk for pre-eclampsia (part 6 of 6)**

| Study, country                                   | Gestation, wk  | Total no. of patients (% with pre-eclampsia) | Patient group (study design*)                                                                                                                                                                                                                                                                             | Reference standard for pre-eclampsia                                                                                                                                                                                                                                                                                | Details of index test                             | Index test cutoff, centile or absolute threshold                                                                                                                                                 | Sensitivity, TP/(TP + FN)                                                                                 | Specificity, TN/(FP + TN)                                                                                           |
|--------------------------------------------------|----------------|----------------------------------------------|-----------------------------------------------------------------------------------------------------------------------------------------------------------------------------------------------------------------------------------------------------------------------------------------------------------|---------------------------------------------------------------------------------------------------------------------------------------------------------------------------------------------------------------------------------------------------------------------------------------------------------------------|---------------------------------------------------|--------------------------------------------------------------------------------------------------------------------------------------------------------------------------------------------------|-----------------------------------------------------------------------------------------------------------|---------------------------------------------------------------------------------------------------------------------|
| Soregaroli et al, <sup>70</sup> Italy            | 24             | 271 (3.3)                                    | Women with high-risk pregnancy (history of gestational hypertension, pre-eclampsia, intrauterine growth restriction, intrauterine demise, chronic hypertension, autoimmune disease, renal disease). Excluded: Women with multiple pregnancy, fetal chromosomal anomalies, pregnancy complications < 24 wk | Blood pressure > 140/90 mm Hg twice, 4 h apart, > 20 wks; proteinuria > 0.3 g protein in 24-h urine collection                                                                                                                                                                                                      | Unreported route, colour + pulsed wave, crossover | Resistance index > 0.6                                                                                                                                                                           | 9/9                                                                                                       | 186/262                                                                                                             |
| Vainio et al, <sup>45</sup> Finland              | 12-14          | 72 (15.3)                                    | Women at high risk of pre-eclampsia. Excluded: those with gestation < 12 or > 14 wk, asthma, allergy to ASA, peptic ulcer, prostaglandin inhibitors < 10 d of investigation                                                                                                                               | Blood pressure ≥ 140/90 mm Hg, proteinuria ≥ 0.3 g protein in 24-h urine collection or dipstick 1+                                                                                                                                                                                                                  | Unreported route, colour + pulsed wave, crossover | Bilateral notching                                                                                                                                                                               | 10/11                                                                                                     | 28/61                                                                                                               |
| Valensise et al, <sup>71</sup> Italy             | 22 and 24      | 16 (43.8)                                    | Women with chronic hypertension                                                                                                                                                                                                                                                                           | Davey and MacGillivray criteria <sup>76</sup> for superimposed pre-eclampsia, not quantified                                                                                                                                                                                                                        | Unreported route, colour + pulsed wave, crossover | Resistance index > 0.58 or notching                                                                                                                                                              | 6/7                                                                                                       | 7/9                                                                                                                 |
| Venkat-raman et al, <sup>72</sup> United Kingdom | 16-18<br>22-24 | 164 (9.8)                                    | Women who had had recurrent miscarriage and are positive for antiphospholipid antibodies (no systemic lupus erythematosus or thromboembolic disease)                                                                                                                                                      | Blood pressure ≥ 140/90 mm Hg twice, 4 h apart, or diastolic blood pressure ≥ 110 mm Hg once, proteinuria ≥ 0.3 g protein in 24-h urine collection                                                                                                                                                                  | Unreported route, colour + pulsed wave, crossover | <ul style="list-style-type: none"> <li>• Any notching</li> <li>• Bilateral notching</li> <li>• Any notching</li> <li>• Bilateral notching</li> </ul>                                             | <ul style="list-style-type: none"> <li>• 10/16</li> <li>• 6/16</li> <li>• 6/16</li> <li>• 4/16</li> </ul> | <ul style="list-style-type: none"> <li>• 81/148</li> <li>• 121/148</li> <li>• 126/148</li> <li>• 139/148</li> </ul> |
| Yu et al, <sup>73</sup> United Kingdom           | 22-24          | 351 (6.0)                                    | Women with twin pregnancy, 2 live fetuses, no fetal abnormality, no twin transfusion syndrome                                                                                                                                                                                                             | Diastolic blood pressure ≥ 90 mm Hg twice, 4 h apart, in previously normotensive women, proteinuria ≥ 0.3 g protein in 24-h urine collection or dipstick ≥ 2+ twice with midstream urine if no 24-h collection available (International Society for the Study of Hypertension in Pregnancy criteria <sup>75</sup> ) | Unreported route, colour + pulsed wave, crossover | <ul style="list-style-type: none"> <li>• Pulsatility index &gt; 95th centile</li> <li>• Bilateral notching only</li> <li>• Pulsatility index &gt; 95th centile and bilateral notching</li> </ul> | <ul style="list-style-type: none"> <li>• 7/21</li> <li>• 4/21</li> <li>• 4/21</li> </ul>                  | <ul style="list-style-type: none"> <li>• 319/330</li> <li>• 322/330</li> <li>• 327/330</li> </ul>                   |
| Zeeman et al, <sup>74</sup> United States        | 16-20          | 52 (21.2)                                    | Women with chronic hypertension requiring medication                                                                                                                                                                                                                                                      | Blood pressure exceeding early pregnancy values, proteinuria ≥ 0.3 g protein in 24-h urine collection or dipstick ≥ 1+ (30 mg/dL)                                                                                                                                                                                   | Unreported route, colour + pulsed wave, crossover | Pulsatility index > 95th centile                                                                                                                                                                 | 4/11                                                                                                      | 29/41                                                                                                               |

Note: A/C ratio = ratio of peak systolic to early diastolic velocity; ASA = acetylsalicylic acid; D/S ratio = ratio of diastolic to systolic velocity; FN = false negative; FP = false positive; HELLP syndrome = hemolytic anemia, elevated liver enzyme levels, low platelet count; S/D ratio = ratio of peak systolic to late diastolic velocity; SD = standard deviation; TN = true negative; TP = true positive.

\*Cohort study unless stated otherwise.

**See next page for references.**

Appendix to Crossen JS, Morris RK, ter Riet G, et al. Uterine artery Doppler ultrasonography to predict pre-eclampsia and intrauterine growth restriction: a systematic review and bivariate meta-analysis. *CMAJ* 2008;178(6):701-11

## References

1. Aardema MW, De Wolf BT, Saro MC, et al. Quantification of the diastolic notch in Doppler ultrasound screening of uterine arteries. *Ultrasound Obstet Gynecol* 2000;16:630-4.
2. Albaiges G, Missfelder-Lobos H, Lees C, et al. One-stage screening for pregnancy complications by color Doppler assessment of the uterine arteries at 23 weeks' gestation. *Obstet Gynecol* 2000;96:559-64.
3. Antsaklis A, Daskalakis G, Tzortzis E, et al. The effect of gestational age and placental location on the prediction of pre-eclampsia by uterine artery Doppler velocimetry in low-risk nulliparous women. *Ultrasound Obstet Gynecol* 2000;16:635-9.
4. Aquilina J, Thompson O, Thilaganathan B, et al. Improved early prediction of pre-eclampsia by combining second-trimester maternal serum inhibin-A and uterine artery Doppler. *Ultrasound Obstet Gynecol* 2001;17:477-84.
5. Aquilina J, Barnett A, Thompson O, et al. Comprehensive analysis of uterine artery flow velocity waveforms for the prediction of pre-eclampsia. *Ultrasound Obstet Gynecol* 2000;16:163-70.
6. Arenas J, Fernandez I, Rodriguez-Mon C, et al. Doppler screening of the uterine arteries to predict complications during pregnancy [in Spanish]. *Clinica e Investigacion en Ginecologia y Obstetricia* 2003;30:178-84.
7. Audibert F, Benchimol Y, Benattar C, et al. Prediction of preeclampsia or intrauterine growth restriction by second trimester serum screening and uterine Doppler velocimetry. *Fetal Diagn Ther* 2005;20:48-53.
8. Ay E, Kavak ZN, Elter K, et al. Screening for pre-eclampsia by using maternal serum inhibin A, activin A, human chorionic gonadotropin, unconjugated estriol, and alpha-fetoprotein levels and uterine artery Doppler in the second trimester of pregnancy. *Aust N Z J Obstet Gynaecol* 2005;45:283-8.
9. Bassim S, Lange M, Salzer H. Uterine artery doppler and pregnancy complications in unselected women [in German]. *Geburtshilfe und Frauenheilkunde* 2006;66:59-62.
10. Bower S, Schuchter K, Campbell S. Doppler ultrasound screening as part of routine antenatal scanning: prediction of pre-eclampsia and intrauterine growth retardation. *BJOG* 1993;100:989-94.
11. Bower S, Bewley S, Campbell S. Improved prediction of preeclampsia by two-stage screening of uterine arteries using the early diastolic notch and color Doppler imaging. *Obstet Gynecol* 1993;82:78-83.
12. Caforio L, Testa AC, Mastromarino C, et al. Predictive value of uterine artery velocimetry at midgestation in low- and high-risk populations: a new perspective. *Fetal Diagn Ther* 1999;14:201-5.
13. Campbell S, Black RS, Lees CC, et al. Doppler ultrasound of the maternal uterine arteries: disappearance of abnormal waveforms and relation to birthweight and pregnancy outcome. *Acta Obstet Gynecol Scand* 2000;79:631-4.
14. Carbillon L, Uzan M, Largilliere C, et al. Prospective evaluation of uterine artery flow velocity waveforms at 12-14 and 22-24 weeks of gestation in relation to pregnancy outcome and birth weight. *Fetal Diagn Ther* 2004;19:381-4.
15. Driul L, Springolo F, Pezzani I, et al. Pathological monolateral Doppler velocimetry of the uterine artery and materno-fetal outcome [Italian]. *Minerva Ginecol* 2002;54:397-402.
16. Frusca T, Soregaroli M, Valcamonica A, et al. Doppler velocimetry of the uterine arteries in nulliparous women. *Early Hum Dev* 1997;48:177-85.
17. Geipel A, Ludwig M, Germer U, et al. Uterine artery Doppler velocimetry and the outcome of pregnancies resulting from ICSI. *Hum Reprod* 2001;16:1397-402.
18. Gómez O, Martínez JM, Figueras F, et al. Uterine artery Doppler at 11-14 weeks of gestation to screen for hypertensive disorders and associated complications in an unselected population. *Ultrasound Obstet Gynecol* 2005;26:490-4.
19. Hafner E, Metzzenbauer M, Hofinger D, et al. Comparison between three-dimensional placental volume at 12 weeks and uterine artery impedance/notching at 22 weeks in screening for pregnancy-induced hypertension, pre-eclampsia and fetal growth restriction in a low-risk population. *Ultrasound Obstet Gynecol* 2006;27:652-7.
20. Harrington K, Fayyad A, Thakur V, et al. The value of uterine artery Doppler in the prediction of uteroplacental complications in multiparous women. *Ultrasound Obstet Gynecol* 2004;23:50-5.
21. Harrington K, Carpenter RG, Goldfrad C, et al. Transvaginal Doppler ultrasound of the uteroplacental circulation in the early prediction of pre-eclampsia and intrauterine growth retardation. *BJOG* 1997;104:674-81.
22. Harrington K, Cooper D, Lees C, et al. Doppler ultrasound of the uterine arteries: the importance of bilateral notching in the prediction of pre-eclampsia, placental abruption or delivery of a small-for-gestational-age baby. *Ultrasound Obstet Gynecol* 1996;7:182-8.
23. Harrington KF, Campbell S, Bewley S, et al. Doppler velocimetry studies of the uterine artery in the early prediction of pre-eclampsia and intra-uterine growth retardation. *Eur J Obstet Gynecol Reprod Biol* 1991;42(Suppl):S14-S20.
24. Kurdi W, Campbell S, Aquilina J, et al. The role of color Doppler imaging of the uterine arteries at 20 weeks' gestation in stratifying antenatal care. *Ultrasound Obstet Gynecol* 1998;12:339-45.
25. Madazli R, Kuseyrioglu B, Uzun H, et al. Prediction of preeclampsia with maternal mid-trimester placental growth factor, activin A, fibronectin and uterine artery Doppler velocimetry. *Int J Gynaecol Obstet* 2005;89:251-7.
26. Marchesoni D, Pezzani I, Springolo F, et al. The use of uterine artery Doppler as a screening test for pre-eclampsia. *Ital J Gynaecol Obstet* 2003;15:15-20.
27. Martin AM, Bindra R, Curcio P, et al. Screening for pre-eclampsia and fetal growth restriction by uterine artery Doppler at 11-14 weeks of gestation. *Ultrasound Obstet Gynecol* 2001;18:583-6.
28. Mires GJ, Williams FL, Leslie J, et al. Assessment of uterine arterial notching as a screening test for adverse pregnancy outcome. *Am J Obstet Gynecol* 1998;179:1317-23.
29. Morris JM, Fay RA, Ellwood DA, et al. A randomized controlled trial of aspirin in patients with abnormal uterine artery blood flow. *Obstet Gynecol* 1996;87:74-8.
30. Nicolaides KH, Bindra R, Turan OM, et al. A novel approach to first-trimester screening for early pre-eclampsia combining serum PP-13 and Doppler ultrasound. *Ultrasound Obstet Gynecol* 2006;27:13-7.
31. North RA, Ferrier C, Long D, et al. Uterine artery Doppler flow velocity waveforms in the second trimester for the prediction of preeclampsia and fetal growth retardation. *Obstet Gynecol* 1994;83:378-6.



32. Ohkuchi A, Minakami H, Sato I, et al. Predicting the risk of pre-eclampsia and a small-for-gestational-age infant by quantitative assessment of the diastolic notch in uterine artery flow velocity waveforms in unselected women. *Ultrasound Obstet Gynecol* 2000;16:171-8.
33. Onalan R, Onalan G, Gunenc Z, et al. Combining 2nd-trimester maternal serum homocysteine levels and uterine artery Doppler for prediction of preeclampsia and isolated intrauterine growth restriction. *Gynecol Obstet Invest* 2005;61:142-8.
34. Papageorgiou AT, Yu CK, Erasmus IE, et al. Assessment of risk for the development of pre-eclampsia by maternal characteristics and uterine artery Doppler. *BJOG* 2005;112:703-9.
35. Park YW, Lim JC, Kim YH, et al. Uterine artery Doppler velocimetry during mid-second trimester to predict complications of pregnancy based on unilateral or bilateral abnormalities. *Yonsei Med J* 2005;46:652-7.
36. Parra M, Rodrigo R, Barja P, et al. Screening test for preeclampsia through assessment of uteroplacental blood flow and biochemical markers of oxidative stress and endothelial dysfunction. *Am J Obstet Gynecol* 2005;193:1486-91.
37. Phupong V, Dejthevaporn T, Tanawattanacharoen S, et al. Predicting the risk of preeclampsia and small for gestational age infants by uterine artery Doppler in low-risk women. *Arch Gynecol Obstet* 2003;268:158-61.
38. Prefumo F, Bhide A, Sairam S, et al. Effect of parity on second-trimester uterine artery Doppler flow velocity and waveforms. *Ultrasound Obstet Gynecol* 2004;23:46-9.
39. Sato H. A study for predicting toxemia of pregnancy by the diastolic notch in pulsed Doppler flow velocity waveforms of the uterine arteries – quantitative analysis of the diastolic notch as uterine arterial index (UTAI) [in Japanese]. *Nippon Sanka Fujinka Gakkai Zasshi* 1995;47:1055-62.
40. Schwarze A, Nelles I, Krapp M, et al. Doppler ultrasound of the uterine artery in the prediction of severe complications during low-risk pregnancies. *Arch Gynecol Obstet* 2005;271:46-52.
41. Soutif C, Prevost A, André M. Value of the systematic uterine Doppler in the primiparous woman. a series of 315 cases [in French]. *J Gynecol Obstet Biol Reprod (Paris)* 1996;25:819-23.
42. Subtil D, Goeusse P, Houfflin-Debauge V, et al. Randomised comparison of uterine artery Doppler and aspirin (100 mg) with placebo in nulliparous women: the Essai Regional Aspirine Mère-Enfant study (part 2). *BJOG* 2003;110:485-91.
43. Tranquilli AL, Giannubilo SR, Bezzeccheri V, et al. The relative weight of Doppler of the uterine artery and 24-h ambulatory blood pressure monitoring in predicting hypertension in pregnancy and preeclampsia [in Italian]. *Acta Biomed Ateneo Parmense* 2000;71(Suppl 1):351-5.
44. Uludag S, Madazli R, Benian A, et al. The relationship between maternal serum alfa fetoprotein and uterine artery Doppler findings at 20-24 weeks' gestation for prediction of preeclampsia and intrauterine growth retardation. *Marmara Med J* 2002;15:169-74.
45. Vainio M, Kujansuu E, Koivisto AM, et al. Bilateral notching of uterine arteries at 12-14 weeks of gestation for prediction of hypertensive disorders of pregnancy. *Acta Obstet Gynecol Scand* 2005;84:1062-7.
46. Valensise H, Romanini C. Second-trimester uterine artery flow velocity waveform and oral glucose tolerance test as a means of predicting intrauterine growth retardation. *Ultrasound Obstet Gynecol* 1993;3:412-6.
47. Valensise H, Bezzeccheri V, Rizzo G, et al. Doppler velocimetry of the uterine artery as a screening test for gestational hypertension. *Ultrasound Obstet Gynecol* 1993;3:18-22.
48. Yu CK, Smith GC, Papageorgiou AT, et al. An integrated model for the prediction of pre-eclampsia using maternal factors and uterine artery Doppler velocimetry in unselected low-risk women. *Am J Obstet Gynecol* 2005;193:429-36.
49. Zimmermann P, Eirio V, Koskinen J, et al. Effect of low-dose aspirin treatment on vascular resistance in the uterine, uteroplacental, renal and umbilical arteries: a prospective longitudinal study on a high risk population with persistent notch in the uterine arteries. *Eur J Ultrasound* 1997;5:17-30.
50. Aardema MW, Lander M, Oosterhof H, et al. Doppler ultrasound screening predicts recurrence of poor pregnancy outcome in subsequent pregnancies, but not the recurrence of PIH or preeclampsia. *Hypertens Pregnancy* 2000;19:281-8.
51. Alkazaleh F, Chaddha V, Viero S, et al. Second-trimester prediction of severe placental complications in women with combined elevations in alpha-fetoprotein and human chorionic gonadotrophin. *Am J Obstet Gynecol* 2006;194:821-7.
52. Axt-Fliedner R, Schwarze A, Nelles I, et al. The value of uterine artery Doppler ultrasound in the prediction of severe complications in a risk population. *Arch Gynecol Obstet* 2005;271:53-8.
53. Caruso A, Caforio L, Testa AC, et al. Chronic hypertension in pregnancy: color Doppler investigation of uterine arteries as a predictive test for superimposed preeclampsia and adverse perinatal outcome. *J Perinat Med* 1996;24:141-53.
54. Caruso A, De Carolis S, Ferrazzani S, et al. Pregnancy outcome in relation to uterine artery flow velocity waveforms and clinical characteristics in women with antiphospholipid syndrome. *Obstet Gynecol* 1993;82:970-7.
55. Chan FY, Pun TC, Lam C, et al. Pregnancy screening by uterine artery Doppler velocimetry: Which criterion performs best? *Obstet Gynecol* 1995;85:596-602.
56. Coleman MA, McCowan LM, North RA. Mid-trimester uterine artery Doppler screening as a predictor of adverse pregnancy outcome in high-risk women. *Ultrasound Obstet Gynecol* 2000;15:7-12.
57. Driul L, Damante G, D'Elia A, et al. Genetic thrombophilias and uterine artery Doppler velocimetry and preeclampsia. *Int J Gynaecol Obstet* 2005;88:265-70.
58. Ferrier C, North RA, Becker G, et al. Uterine artery waveform as a predictor of pregnancy outcome in women with underlying renal disease. *Clin Nephrol* 1994;42:362-8.
59. Frusca T, Soregaroli M, Zanelli S, et al. Role of uterine artery Doppler investigation in pregnant women with chronic hypertension. *Eur J Obstet Gynecol Reprod Biol* 1998;79:47-50.
60. Frusca T, Soregaroli M, Danti L, et al. Uterine artery velocimetry as a screening test in patients with previous preeclampsia. *Ital J Gynaecol Obstet* 1996;8:94-8.
61. Geipel A, Berg C, Germer U, et al. Doppler assessment of the uterine circulation in the second trimester in twin pregnancies: prediction of pre-eclampsia, fetal growth restriction and birth weight discordance. *Ultrasound Obstet Gynecol* 2002;20:541-5.

62. Haddad B, Uzan M, Bréart G, et al. Uterine Doppler wave form and the prediction of the recurrence of pre-eclampsia and intra-uterine growth retardation in patients treated with low-dose aspirin. *Eur J Obstet Gynecol Reprod Biol* 1995;62:179-83.
63. Hershkovitz R, de Swiet M, Kingdom J. Mid-trimester placentation assessment in high-risk pregnancies using maternal serum screening and uterine artery Doppler. *Hypertens Pregnancy* 2005;24:273-80.
64. Konchak PS, Bernstein IM, Capeless EL. Uterine artery Doppler velocimetry in the detection of adverse obstetric outcomes in women with unexplained elevated maternal serum alpha-fetoprotein levels. *Am J Obstet Gynecol* 1995;173:1115-9.
65. Le Thi Huong D, Wechsler B, Vauthier-Brouzes D, et al. The second trimester Doppler ultrasound examination is the best predictor of late pregnancy outcome in systemic lupus erythematosus and/or the antiphospholipid syndrome. *Rheumatology (Oxford)* 2006;45:332-8.
66. Nagtegaal MJ, van Rijswijk S, McGavin S, et al. Use of uterine Doppler in an Australian level II maternity hospital. *Aust N Z J Obstet Gynaecol* 2005;45:424-9.
67. Parretti E, Mealli F, Magrini A, et al. Cross-sectional and longitudinal evaluation of uterine artery Doppler velocimetry for the prediction of pre-eclampsia in normotensive women with specific risk factors. *Ultrasound Obstet Gynecol* 2003;22:160-5.
68. Pattinson RC, Brink AL, De Wet PE, et al. Early detection of poor fetal prognosis by serial Doppler velocimetry in high-risk pregnancies. *S Afr Med J* 1991;80:428-31.
69. Rizzo G, Arduini D, Romanini C. Uterine artery Doppler velocity waveforms in twin pregnancies. *Obstet Gynecol* 1993;82:978-83.
70. Soregaroli M, Valcamonica A, Scalvi L, et al. Late normalisation of uterine artery velocimetry in high risk pregnancy. *Eur J Obstet Gynecol Reprod Biol* 2001;95:42-5.
71. Valensise H, Romanini C. Uterine Doppler in the identification of patients at risk for hypertension and IUGR. *J Perinat Med* 1994;22 Suppl 1:69-72.
72. Venkat-Raman N, Backos M, Teoh TG, et al. Uterine artery Doppler in predicting pregnancy outcome in women with antiphospholipid syndrome. *Obstet Gynecol* 2001;98:235-42.
73. Yu CK, Papageorghiou AT, Boli A, et al. Screening for pre-eclampsia and fetal growth restriction in twin pregnancies at 23 weeks of gestation by transvaginal uterine artery Doppler. *Ultrasound Obstet Gynecol* 2002;20:535-40.
74. Zeeman GG, McIntire DD, Twickler DM. Maternal and fetal artery Doppler findings in women with chronic hypertension who subsequently develop superimposed pre-eclampsia. *J Matern Fetal Neonatal Med* 2003;14:318-23.
75. Brown MA, Lindheimer MD, de Swiet M, et al. The classification and diagnosis of the hypertensive disorders of pregnancy: statement from the International Society for the Study of Hypertension in Pregnancy (ISSHP). *Hypertens Pregnancy* 2001;20:IX-XIV.
76. Davey DA, MacGillivray I. The classification and definition of the hypertensive disorders of pregnancy. *Am J Obstet Gynecol* 1988;158:892-8.
77. American College of Obstetricians and Gynecologists. Hypertension in pregnancy. ACOG Technical Bulletin, vol 219. Washington (DC): The College; 1996.
78. Brown MA, Hague WM, Higgins J, et al. The detection, investigation and management of hypertension in pregnancy. *Aust N Z Obstet Gynecol* 2000;40:133-55.
