# Supplementary material
Source: PubMed Central journal article supplement (PMC2263112)
Supplement: cmaj_178_6_701_v2_4.pdf [file cmaj_178_6_701_v2_4.pdf]

**Appendix 4:** Characteristics of studies of uterine artery Doppler ultrasonography used to predict intrauterine growth restriction in patients at low risk or unspecified risk (Appendix 4A) and in patients at high risk (Appendix 4B)

**Appendix 4A:** Patients at low risk or unspecified risk of intrauterine growth restriction (part 1 of 6)

| Study, country                                 | Gestation, wk | Total no. of patients (% with intrauterine growth restriction)                       | Patient group (study design*)                                                                                                                                                                                                                                    | Reference standard for intrauterine growth restriction                                                                                                                                              | Details of index test                             | Index test cutoff, centile or absolute threshold                                                                                                                                                                                                                               | Sensitivity, TP/(TP + FN)                                                                                  | Specificity, TN/(FP + TN)                                                                                                        |
|------------------------------------------------|---------------|--------------------------------------------------------------------------------------|------------------------------------------------------------------------------------------------------------------------------------------------------------------------------------------------------------------------------------------------------------------|-----------------------------------------------------------------------------------------------------------------------------------------------------------------------------------------------------|---------------------------------------------------|--------------------------------------------------------------------------------------------------------------------------------------------------------------------------------------------------------------------------------------------------------------------------------|------------------------------------------------------------------------------------------------------------|----------------------------------------------------------------------------------------------------------------------------------|
| Albaiges et al, <sup>1</sup><br>United Kingdom | 22-25         | 1757 (8.9 for birth weight < 10th centile; 2.9 for birth weight < 3rd centile)       | Women with singleton pregnancy receiving routine antenatal care                                                                                                                                                                                                  | a) Birth weight < 10th centile<br>b) Birth weight < 3rd centile (local and gestational values)                                                                                                      | Unreported route, colour + pulsed wave, crossover | <ul style="list-style-type: none"> <li>• Bilateral notching or mean pulsatility index &gt; 1.45 (95th centile)</li> <li>• Bilateral notching only</li> <li>• Mean pulsatility index &gt; 1.45 only</li> <li>• Mean pulsatility index &gt; 1.45 + bilateral notching</li> </ul> | a) 32/143<br>b) 16/52<br><br>a) 19/143<br>b) 12/52<br>a) 30/143<br>b) 35/52<br>a) 17/143<br>b) 12/40       | a) 1518/1614<br>b) 1593/1705<br><br>a) 1556/1614<br>b) 1637/1705<br>a) 1554/1614<br>b) 1621/1705<br>a) 1593/1614<br>b) 1678/1705 |
| Arenas et al, <sup>2</sup> Spain               | 20            | 319 (8.2)                                                                            | Women at unspecified risk. Excluded: women with multiple pregnancy, congenital defects                                                                                                                                                                           | Birth weight < 10th centile (local and gestational values)                                                                                                                                          | Transabdominal, colour + pulsed wave, crossover   | <ul style="list-style-type: none"> <li>• Mean resistance index ≥ 0.59 (75th centile)</li> <li>• Mean resistance index ≥ 0.52 (50th centile)</li> <li>• Mean resistance index ≥ 0.65 (90th centile)</li> <li>• Mean resistance index ≥ 0.71 (95th centile)</li> </ul>           | <ul style="list-style-type: none"> <li>• 12/26</li> <li>• 16/26</li> <li>• 5/26</li> <li>• 3/26</li> </ul> | <ul style="list-style-type: none"> <li>• 216/293</li> <li>• 134/293</li> <li>• 261/293</li> <li>• 277/293</li> </ul>             |
| Audibert et al, <sup>3</sup><br>France         | 18-26         | 2615 (8.8)                                                                           | Women who had α-fetoprotein and human chorionic gonadotrophin testing at 14-18 wk and ultrasound screening. Excluded: Women without ultrasound screening at 10-14 wk for dating, women with raised nuchal translucency, no Doppler at 18-26 wk, delivery < 24 wk | Birth weight < 10th centile (local values)                                                                                                                                                          | Unreported route, type and site                   | <ul style="list-style-type: none"> <li>• Bilateral notching</li> <li>• Unilateral notching</li> </ul>                                                                                                                                                                          | <ul style="list-style-type: none"> <li>• 30/230</li> <li>• 52/230</li> </ul>                               | <ul style="list-style-type: none"> <li>• 2300/2385</li> <li>• 2118/2385</li> </ul>                                               |
| Bassim et al, <sup>4</sup><br>Switzerland      | 20-24         | 490 (5.3)                                                                            | Women who underwent routine screening                                                                                                                                                                                                                            | Birth weight < 10th (local values)                                                                                                                                                                  | Transabdominal, unreported type, crossover        | Bilateral notching                                                                                                                                                                                                                                                             | 8/26                                                                                                       | 436/464                                                                                                                          |
| Bower et al, <sup>5</sup><br>United Kingdom    | 18-22         | 2058 (10.9, 5.2 and 3.5 for birth weight < 10th, 5th and 3rd centiles, respectively) | Women at unspecified risk. Excluded: women with multiple pregnancy, gestational age outside study limits, fetal anomalies                                                                                                                                        | <ul style="list-style-type: none"> <li>• Birth weight &lt; 10th centile</li> <li>• Birth weight &lt; 5th centile</li> <li>• Birth weight &lt; 3rd centile (local and gestational values)</li> </ul> | Transabdominal, continuous wave, crossover        | <ul style="list-style-type: none"> <li>• Resistance index &gt; 95th centile either side or any notching</li> <li>• Birth weight &lt; 10th centile</li> <li>• Birth weight &lt; 5th centile</li> <li>• Birth weight &lt; 3rd centile</li> </ul>                                 | <ul style="list-style-type: none"> <li>• 84/225</li> <li>• 49/106</li> <li>• 34/73</li> </ul>              | <ul style="list-style-type: none"> <li>• 1588/1833</li> <li>• 1672/1833</li> <li>• 1690/1833</li> </ul>                          |

*continued*

**Appendix 4A: Patients at low risk or unspecified risk of intrauterine growth restriction (part 2 of 6)**

| Study, country                            | Gestation, wk  | Total no. of patients (% with intrauterine growth restriction) | Patient group (study design*)                                                                                                                                                                                                                                 | Reference standard for intrauterine growth restriction                                       | Details of index test                                         | Index test cutoff, centile or absolute threshold                                                                                                     | Sensitivity, TP/(TP + FN)                    | Specificity, TN/(FP + TN)                            |
|-------------------------------------------|----------------|----------------------------------------------------------------|---------------------------------------------------------------------------------------------------------------------------------------------------------------------------------------------------------------------------------------------------------------|----------------------------------------------------------------------------------------------|---------------------------------------------------------------|------------------------------------------------------------------------------------------------------------------------------------------------------|----------------------------------------------|------------------------------------------------------|
| Caforio et al, <sup>6</sup> Italy         | 18-20<br>22-24 | 530 (5.1)<br>530 (10.9)                                        | Healthy nulliparous women. Excluded: women with congenital defects, chromosomal abnormalities, multiple pregnancies, infections, Rhesus isoimmunization, non-immune hydrops, preterm prelabour rupture of membranes, intrauterine demise, delivery < 26 weeks | a) Birth weight < 1750 g<br>b) Birth weight < 2500 g                                         | Unreported route, colour + pulsed wave, crossover             | Resistance index > 90th centile<br>• Gestational age 18-20 wk<br><br>• Gestational age 22-24 wk                                                      | a) 16/27<br>b) 33/58<br>a) 14/27<br>b) 31/63 | a) 355/502<br>b) 338/472<br>a) 378/505<br>b) 369/467 |
| Carbillon et al, <sup>7</sup> France      | 12-14<br>22-24 | 243 (9.4)                                                      | Women undergoing routine ultrasound screening                                                                                                                                                                                                                 | Fetal growth restriction no threshold                                                        | Transabdominal, unreported type, ascending branch             | • No notching at 12-14 wk v. unilateral or bilateral notching<br>• Bilateral notching at 22-24 wk                                                    | • 19/23<br>• 6/23                            | • 100/220<br>• 205/220                               |
| Driul et al, <sup>8</sup> Italy           | 24             | 830 (1.8)                                                      | Not reported                                                                                                                                                                                                                                                  | Fetal growth restriction unreported threshold                                                | Unreported route, colour, crossover                           | Resistance index ≥ 0.6 or unilateral notching                                                                                                        | 8/15                                         | 722/825                                              |
| Dugoff et al, <sup>9</sup> United Kingdom | 10-14          | 1008 (1.2)                                                     | Women enrolled in FASTER trial. Excluded: women with structural or chromosomal anomalies, fetal genetic syndrome, intrauterine stillbirth < 24 wk, congenital uterine malformation                                                                            | Birth weight < 10th centile (local and gestational values)                                   | Transabdominal, colour + pulsed wave, crossover               | • Mean resistance index ≥ 0.81 (95th)<br>• Mean resistance index ≥ 0.78 (90th)<br>• Mean resistance index ≥ 0.70 (75th)                              | • 2/12<br>• 4/12<br>• 8/12                   | • 947/996<br>• 894/996<br>• 748/996                  |
| Frusca et al, <sup>10</sup> Italy         | 24             | 419 (7.1)<br>419 (2.6)                                         | Nulliparous women without risk factors. Excluded: women with chronic hypertension, diabetes mellitus, autoimmune disease                                                                                                                                      | • Birth weight < 10th centile (local and gestational values)<br>• Birth weight < 3rd centile | Transabdominal, colour + pulsed wave, crossover               | Resistance index > 0.58<br>• Birth weight < 10th centile<br>• Birth weight < 3rd centile                                                             | • 13/30<br>• 6/11                            | • 366/389<br>• 378/408                               |
| Geipel et al, <sup>11</sup> Germany       | 18-24          | 114 (8.8)                                                      | Women with singleton pregnancy (control group for women undergoing intracytoplasmic sperm injection)                                                                                                                                                          | Birth weight < 10th centile (local values)                                                   | Unreported route, colour, crossover                           | Bilateral notching + mean resistance index > 0.55 or unilateral notching + mean resistance index > 0.65 or no notching + mean resistance index > 0.7 | 5/10                                         | 85/104                                               |
| Gomez et al, <sup>12</sup> Spain          | 11-14          | 999 (3.7)                                                      | Women with singleton pregnancy attending for routine antenatal care. Excluded: Fetal anomalies, women treated with aspirin, heparin or antihypertensive medication before enrolment                                                                           | Birth weight < 5th centile (local and gestational values)                                    | Transvaginal, colour + pulsed wave, cervicocorporeal junction | Mean pulsatility index > 95th centile                                                                                                                | 9/37                                         | 918/962                                              |

*continued*

**Appendix 4A: Patients at low risk or unspecified risk of intrauterine growth restriction (part 3 of 6)**

| Study, country                                    | Gestation, wk   | Total no. of patients (% with intrauterine growth restriction)            | Patient group (study design*)                                                                                                                      | Reference standard for intrauterine growth restriction                                                                                                       | Details of index test                           | Index test cutoff, centile or absolute threshold                                                                                                                                                                                                                                                                | Sensitivity, TP/(TP + FN)                                                                                          | Specificity, TN/(FP + TN)                                                                                                    |
|---------------------------------------------------|-----------------|---------------------------------------------------------------------------|----------------------------------------------------------------------------------------------------------------------------------------------------|--------------------------------------------------------------------------------------------------------------------------------------------------------------|-------------------------------------------------|-----------------------------------------------------------------------------------------------------------------------------------------------------------------------------------------------------------------------------------------------------------------------------------------------------------------|--------------------------------------------------------------------------------------------------------------------|------------------------------------------------------------------------------------------------------------------------------|
| Hafner et al, <sup>13</sup><br>Germany            | 21-23           | 2489 (6.8)                                                                | All singleton pregnancies                                                                                                                          | Birth weight < 10th centile (unreported dataset)                                                                                                             | Transabdominal, colour + pulsed wave, crossover | <ul style="list-style-type: none"> <li>• Bilateral notching</li> <li>• Mean pulsatility index <math>\geq</math> 90th</li> </ul>                                                                                                                                                                                 | <ul style="list-style-type: none"> <li>• 37/168</li> <li>• 34/168</li> </ul>                                       | <ul style="list-style-type: none"> <li>• 2132/2321</li> <li>• 2103/2321</li> </ul>                                           |
| Harrington et al, <sup>14</sup><br>United Kingdom | 12-16           | 623 (19.9)                                                                | Unselected singleton pregnancies                                                                                                                   | Birth weight < 10th centile (local and gestational values)                                                                                                   | Transvaginal, unreported type and site          | <ul style="list-style-type: none"> <li>• Bilateral v. unilateral or no notching</li> <li>• Bilateral or unilateral v. no notching</li> </ul>                                                                                                                                                                    | <ul style="list-style-type: none"> <li>• 42/61</li> <li>• 53/61</li> </ul>                                         | <ul style="list-style-type: none"> <li>• 399/562</li> <li>• 268/562</li> </ul>                                               |
| Harrington et al, <sup>15</sup><br>United Kingdom | 24              | 1204 (10.8)                                                               | Women at unspecified risk. Excluded: women with multiple pregnancy, fetal anomalies, pre-eclampsia or intrauterine growth restriction $\leq$ 24 wk | Birth weight < 10th centile (local and gestational values)                                                                                                   | Transabdominal, colour + pulsed wave, crossover | <ul style="list-style-type: none"> <li>• Any notching or mean resistance index &gt; 95th centile</li> <li>• Unilateral or bilateral notching</li> <li>• Unilateral notching</li> <li>• Bilateral notching</li> </ul>                                                                                            | <ul style="list-style-type: none"> <li>• 42/131</li> <li>• 42/131</li> <li>• 18/131</li> <li>• 24/131</li> </ul>   | <ul style="list-style-type: none"> <li>• 1005/1073</li> <li>• 1005/1073</li> <li>• 1029/1073</li> <li>• 1049/1073</li> </ul> |
| Harrington et al, <sup>16</sup><br>United Kingdom | 19-21           | 458 (5.2)                                                                 | Multiparous women with singleton pregnancy at unspecified risk. Excluded: women with fetal anomalies                                               | Birth weight < 5th centile (local values)                                                                                                                    | Transabdominal, colour + pulsed wave, crossover | Bilateral notching + mean resistance index $\geq$ 0.55 (50th) or unilateral notching and mean resistance index $\geq$ 0.65 (80th)                                                                                                                                                                               | 8/23                                                                                                               | 402/435                                                                                                                      |
| Jorn et al, <sup>17</sup><br>Germany              | 18-24           | 602 (4.8)                                                                 | Not reported                                                                                                                                       | Birth weight < 5th centile (local and gestational values)                                                                                                    | Transabdominal, colour, ascending branch        | Mean resistance index > 0.61                                                                                                                                                                                                                                                                                    | 22/29                                                                                                              | 527/573                                                                                                                      |
| Kurdi et al, <sup>18</sup><br>United Kingdom      | 19-21           | 946 (16.5 and 6.0 for birth weight < 10th and 5th centiles, respectively) | Women at unspecified risk. Excluded: women with multiple pregnancy, fetal anomalies, or receiving low-dose ASA therapy                             | <ul style="list-style-type: none"> <li>a) Birth weight &lt; 10th centile</li> <li>b) Birth weight &lt; 5th centile (local and gestational values)</li> </ul> | Transabdominal, colour + pulsed wave, crossover | <ul style="list-style-type: none"> <li>• Bilateral notching + mean resistance index &gt; 0.55(50th) or unilateral notching + mean resistance index &gt; 0.65 (90th), or no notching + mean resistance index &gt; 0.70 (90th)</li> <li>• Bilateral notching + mean resistance index &gt; 0.55 (50th)</li> </ul>  | <ul style="list-style-type: none"> <li>a) 70/156</li> <li>b) 27/57</li> <li>a) 70/156</li> <li>b) 21/57</li> </ul> | <ul style="list-style-type: none"> <li>a) 644/790</li> <li>b) 700/889</li> <li>a) 86/790</li> <li>b) 793/889</li> </ul>      |
| Kurdi et al, <sup>19</sup><br>United Kingdom      | 19-21 and 24-26 | 779 (13.2 and 4.2 for birth weight < 10th and 3rd centiles, respectively) | Subgroup analysis of cohort in reference 18 with normalization of Doppler at 24-26 wk                                                              | <ul style="list-style-type: none"> <li>a) Birth weight &lt; 10th centile</li> <li>b) Birth weight &lt; 3rd centile (local and gestational values)</li> </ul> | Transabdominal, colour + pulsed wave, crossover | <ul style="list-style-type: none"> <li>• Bilateral notching + mean resistance index &gt; 0.55 (50th) or unilateral notching + mean resistance index &gt; 0.65 (90th), or no notching + mean resistance index &gt; 0.70 (90th)</li> <li>• Bilateral notching + mean resistance index &gt; 0.55 (50th)</li> </ul> | <ul style="list-style-type: none"> <li>a) 16/103</li> <li>b) 29/33</li> <li>a) 16/103</li> <li>b) 29/33</li> </ul> | <ul style="list-style-type: none"> <li>a) 643/676</li> <li>b) 701/746</li> <li>a) 643/676</li> <li>b) 701/746</li> </ul>     |
| Liberati et al, <sup>20</sup><br>Israel           | 22-24           | 481 (8.5)                                                                 | Women with lateral placentas. Excluded: women with preterm delivery, multiple pregnancy, major fetal anomalies                                     | Birth weight < 10th centile (local values)                                                                                                                   | Transabdominal, colour + pulsed wave, crossover | <ul style="list-style-type: none"> <li>• Mean resistance index <math>\geq</math> 90th centile</li> <li>• Unilateral notching or mean resistance index <math>\geq</math> 90th centile</li> </ul>                                                                                                                 | <ul style="list-style-type: none"> <li>• 11/41</li> <li>• 16/41</li> </ul>                                         | <ul style="list-style-type: none"> <li>• 422/440</li> <li>• 406/440</li> </ul>                                               |

*continued*

**Appendix 4A: Patients at low risk or unspecified risk of intrauterine growth restriction (part 4 of 6)**

| Study, country                                    | Gestation, wk | Total no. of patients (% with intrauterine growth restriction) | Patient group (study design*)                                                                                                                                                                                                                                                                                                      | Reference standard for intrauterine growth restriction                                                                                                                                    | Details of index test                                             | Index test cutoff, centile or absolute threshold                                                                                                                                                                                                                                                                            | Sensitivity, TP/(TP + FN)                                                                                                                                       | Specificity, TN/(FP + TN)                                                                                                                                                     |
|---------------------------------------------------|---------------|----------------------------------------------------------------|------------------------------------------------------------------------------------------------------------------------------------------------------------------------------------------------------------------------------------------------------------------------------------------------------------------------------------|-------------------------------------------------------------------------------------------------------------------------------------------------------------------------------------------|-------------------------------------------------------------------|-----------------------------------------------------------------------------------------------------------------------------------------------------------------------------------------------------------------------------------------------------------------------------------------------------------------------------|-----------------------------------------------------------------------------------------------------------------------------------------------------------------|-------------------------------------------------------------------------------------------------------------------------------------------------------------------------------|
| Marchesoni <sup>21</sup> (2003), Italy            | 24            | 900 (1.7)                                                      | Women at unspecified risk                                                                                                                                                                                                                                                                                                          | Birth weight < 3rd centile                                                                                                                                                                | Unreported route and type, crossover                              | <ul style="list-style-type: none"> <li>• Bilateral v. unilateral or no notching</li> <li>• Bilateral or uni v. no notching</li> </ul>                                                                                                                                                                                       | <ul style="list-style-type: none"> <li>• 0/15</li> <li>• 8/15</li> </ul>                                                                                        | <ul style="list-style-type: none"> <li>• 825/885</li> <li>• 722/885</li> </ul>                                                                                                |
| Martin et al, <sup>22</sup> United Kingdom        | 11-14         | 3045 (9.5)                                                     | Routine antenatal care                                                                                                                                                                                                                                                                                                             | Birth weight < 10th centile (local and gestational values)                                                                                                                                | Transabdominal, colour + pulsed wave, ascending branch            | Mean pulsatility index > 2.35 (95th)                                                                                                                                                                                                                                                                                        | 34/290                                                                                                                                                          | 2639/2760                                                                                                                                                                     |
| Miyakoshi et al, <sup>23</sup> Japan              | 21-24         | 359 (11.4)                                                     | Not reported                                                                                                                                                                                                                                                                                                                       | Birth weight < 10th centile (local and gestational values)                                                                                                                                | Unreported route, colour + pulsed wave, crossover                 | Mean pulsatility index > 95th or unilateral notching                                                                                                                                                                                                                                                                        | 10/41                                                                                                                                                           | 300/318                                                                                                                                                                       |
| Morris et al, <sup>24</sup> Australia             | 18            | 768 (12.7)<br>768 (4.6)<br>679 (10.9)                          | All nulliparous women (randomized controlled trial)                                                                                                                                                                                                                                                                                | <ul style="list-style-type: none"> <li>• Birth weight &lt; 10th centile (local values)</li> <li>• Birth weight &lt; 3rd centile</li> <li>• Pulsatility index &lt; 10th centile</li> </ul> | Transabdominal, colour + pulsed wave, crossover                   | <ul style="list-style-type: none"> <li>• S/D ratio &gt; 3.0 (90th) + any notching or S/D ratio &gt; 3.3 (2 SD)</li> <li>• Birth weight &lt; 10th centile</li> <li>• Birth weight &lt; 3rd centile</li> <li>• Pulsatility index &lt; 10th centile</li> </ul>                                                                 | <ul style="list-style-type: none"> <li>• 21/98</li> <li>• 9/35</li> <li>• 15/74</li> </ul>                                                                      | <ul style="list-style-type: none"> <li>• 616/670</li> <li>• 667/733</li> <li>• 559/605</li> </ul>                                                                             |
| North et al, <sup>25</sup> Australia              | 19-24         | 457 (6.6)                                                      | Healthy nulliparous women. Excluded: with renal disease, diabetes mellitus                                                                                                                                                                                                                                                         | Birth weight < 10th centile (local and gestational values)                                                                                                                                | Transabdominal, colour + pulsed wave, crossover                   | <ul style="list-style-type: none"> <li>• Resistance index &gt; 90th centile</li> <li>• S/D ratio &gt; 90th centile</li> <li>• Resistance index &gt; 0.53</li> <li>• Resistance index &gt; 0.54</li> <li>• Resistance index &gt; 0.55</li> <li>• Resistance index &gt; 0.56</li> <li>• Resistance index &gt; 0.57</li> </ul> | <ul style="list-style-type: none"> <li>• 15/30</li> <li>• 14/30</li> <li>• 17/30</li> <li>• 16/30</li> <li>• 16/30</li> <li>• 16/30</li> <li>• 14/30</li> </ul> | <ul style="list-style-type: none"> <li>• 386/427</li> <li>• 380/427</li> <li>• 342/427</li> <li>• 354/427</li> <li>• 368/427</li> <li>• 383/427</li> <li>• 390/427</li> </ul> |
| Ohkuchi et al, <sup>26</sup> Japan                | 16-23         | 288 (6.3)                                                      | Women at unspecified risk with singleton pregnancy                                                                                                                                                                                                                                                                                 | Birth weight < 10th centile (local and gestational values)                                                                                                                                | Transabdominal, colour + pulsed wave, crossover                   | <ul style="list-style-type: none"> <li>• Resistance index &gt; 70th centile</li> <li>• S/D ratio &gt; 78th centile</li> <li>• Notch depth index &gt; 0.14</li> <li>• Any notching</li> <li>• Bilateral notching</li> </ul>                                                                                                  | <ul style="list-style-type: none"> <li>• 10/18</li> <li>• 9/18</li> <li>• 6/18</li> <li>• 6/18</li> <li>• 3/18</li> </ul>                                       | <ul style="list-style-type: none"> <li>• 168/270</li> <li>• 201/270</li> <li>• 249/270</li> <li>• 217/270</li> <li>• 225/270</li> </ul>                                       |
| Onalan et al, <sup>27</sup> Turkey                | 19-21         | 406 (10.1)                                                     | Women whose fasting total serum homocysteine levels were measured. Excluded: women with multiple pregnancy, history of pre-eclampsia, hypertension < 20 wk, altered renal function, diabetes mellitus, chronic disease, fetal anomalies, folic acid use > 12 wk, special folate diet, treatment with antifolate drugs, age > 40 yr | Birth weight < 5th centile (local values)                                                                                                                                                 | Unreported route, type and site                                   | Bilateral notching + mean resistance index > 0.55 or unilateral notching + mean resistance index > 0.65 or no notching + mean resistance index > 0.7                                                                                                                                                                        | 15/41                                                                                                                                                           | 346/365                                                                                                                                                                       |
| Papageorghiou et al, <sup>28</sup> United Kingdom | 20-24         | 7851 (9.4)                                                     | Women with singleton pregnancy attending for routine antenatal care                                                                                                                                                                                                                                                                | Birth weight < 10th centile (local and gestational values)                                                                                                                                | Transvaginal, colour + pulsed wave, level of internal cervical os | Mean pulsatility index > 1.63 (95th centile)                                                                                                                                                                                                                                                                                | 121/740                                                                                                                                                         | 6831/7111                                                                                                                                                                     |

*continued*

**Appendix 4A: Patients at low risk or unspecified risk of intrauterine growth restriction (part 5 of 6)**

| Study, country                              | Gestation, wk              | Total no. of patients (% with intrauterine growth restriction) | Patient group (study design*)                                                                                                                                                                                                                                                                | Reference standard for intrauterine growth restriction          | Details of index test                                     | Index test cutoff, centile or absolute threshold                                                                                                                                                                                                                           | Sensitivity, TP/(TP + FN)                                                                                                                    | Specificity, TN/(FP + TN)                                                                                                                                  |
|---------------------------------------------|----------------------------|----------------------------------------------------------------|----------------------------------------------------------------------------------------------------------------------------------------------------------------------------------------------------------------------------------------------------------------------------------------------|-----------------------------------------------------------------|-----------------------------------------------------------|----------------------------------------------------------------------------------------------------------------------------------------------------------------------------------------------------------------------------------------------------------------------------|----------------------------------------------------------------------------------------------------------------------------------------------|------------------------------------------------------------------------------------------------------------------------------------------------------------|
| Park et al, <sup>29</sup> Korea             | 20-24                      | 1090 (9.5)                                                     | Low-risk women. Excluded: women with multiple pregnancy, fetal anomalies, cardiovascular and renal diseases, diabetes mellitus, intrauterine growth restriction, pregnancy-induced hypertension, preterm labour before performance of Doppler                                                | Birth weight < 10th centile (local and gestational values)      | Transabdominal, colour + pulsed wave, previously reported | <ul style="list-style-type: none"> <li>S/D ratio &gt; 2 SD or any notching</li> <li>S/D ratio &gt; 2 SD or bilateral notching only</li> </ul>                                                                                                                              | <ul style="list-style-type: none"> <li>• 38/104</li> <li>• 18/104</li> </ul>                                                                 | <ul style="list-style-type: none"> <li>• 759/986</li> <li>• 935/986</li> </ul>                                                                             |
| Phupong et al, <sup>30</sup> Thailand       | 22-28 (mean 24.9 [SD 1.9]) | 324 (1.9)                                                      | Healthy nulliparous and multiparous women. Excluded: women with multiple pregnancy, renal and cardiovascular disease, diabetes mellitus, fetal anomalies                                                                                                                                     | Birth weight < 10th centile (gestational values)                | Transabdominal, colour + pulsed wave, crossover           | S/D ratio + 2 SD or bilateral notching                                                                                                                                                                                                                                     | 4/6                                                                                                                                          | 262/318                                                                                                                                                    |
| Prefumo et al, <sup>31</sup> United Kingdom | 11-14<br>18-23             | 662 (9.8)                                                      | All singleton live births from clinical database. Excluded: multiparous women, women with fetal anomalies, concurrent maternal disease and gestational diabetes                                                                                                                              | Birth weight < 10th centile (local, gestational and sex values) | Unreported route, colour, ascending branch                | Bilateral notching <ul style="list-style-type: none"> <li>• Gestation 11-14 wk</li> <li>• Gestation 18-23 wk</li> </ul>                                                                                                                                                    | <ul style="list-style-type: none"> <li>• 37/65</li> <li>• 4/65</li> </ul>                                                                    | <ul style="list-style-type: none"> <li>• 383/597</li> <li>• 572/597</li> </ul>                                                                             |
| Schwarze et al, <sup>32</sup> Germany       | 19-26                      | 346 (10.1)                                                     | Women with singleton pregnancy. Excluded: women with essential hypertension, diabetes mellitus, autoimmune disease, history of pre-eclampsia, intrauterine growth restriction, intrauterine stillbirth, placental abruption in previous pregnancies, multiple pregnancy, fetal abnormalities | Birth weight < 10th centile                                     | Transabdominal, colour, crossover                         | <ul style="list-style-type: none"> <li>• Any resistance index &gt; 0.58</li> <li>• Both resistance indexes &gt; 0.58</li> <li>• Any resistance index &gt; 0.7</li> <li>• Both resistance indexes &gt; 0.7</li> <li>• Any notching</li> <li>• Bilateral notching</li> </ul> | <ul style="list-style-type: none"> <li>• 18/35</li> <li>• 4/35</li> <li>• 7/35</li> <li>• 12/35</li> <li>• 20/35</li> <li>• 10/35</li> </ul> | <ul style="list-style-type: none"> <li>• 195/311</li> <li>• 264/311</li> <li>• 270/311</li> <li>• 246/311</li> <li>• 187/311</li> <li>• 214/311</li> </ul> |
| Sekizuka et al, <sup>33</sup> Japan         | 6-13                       | 135 (7.4)                                                      | Low-risk women. Excluded: women with threatened abortions and fibroids                                                                                                                                                                                                                       | Birth weight < 10th centile (local and gestational values)      | Transvaginal, colour + pulsed wave, internal os           | Bilateral notching                                                                                                                                                                                                                                                         | 9/10                                                                                                                                         | 10/125                                                                                                                                                     |
| Soutif et al, <sup>34</sup> France          | 21                         | 315 (10.4)                                                     | Primiparous women. Excluded: women with nephropathy, chronic hypertension, diabetes mellitus, systemic disorders, multiple pregnancy                                                                                                                                                         | Birth weight < 10th centile (local values)                      | Unreported route and site, colour + pulsed wave           | S/D ratio > 2.6 or any notching                                                                                                                                                                                                                                            | 10/33                                                                                                                                        | 242/282                                                                                                                                                    |

*continued*

**Appendix 4A: Patients at low risk or unspecified risk of intrauterine growth restriction (part 6 of 6)**

| Study, country                                 | Gestation, wk | Total no. of patients (% with intrauterine growth restriction) | Patient group (study design*)                                                                                                                                                                                                                                                                                                                 | Reference standard for intrauterine growth restriction                                       | Details of index test                                    | Index test cutoff, centile or absolute threshold                                                         | Sensitivity, TP/(TP + FN) | Specificity, TN/(FP + TN) |
|------------------------------------------------|---------------|----------------------------------------------------------------|-----------------------------------------------------------------------------------------------------------------------------------------------------------------------------------------------------------------------------------------------------------------------------------------------------------------------------------------------|----------------------------------------------------------------------------------------------|----------------------------------------------------------|----------------------------------------------------------------------------------------------------------|---------------------------|---------------------------|
| Subtil et al, <sup>35</sup><br>France, Belgium | 22-24         | 1186 (1.9)<br>1186 (10.3)                                      | Women undergoing routine Doppler ultrasonography followed by ASA prescription v. placebo in case of abnormal Doppler findings (randomized controlled trial)                                                                                                                                                                                   | • Birth weight ≤ 3rd centile (local and gestational values)<br>• Birth weight ≤ 10th centile | Unreported route and type, crossover                     | Resistance index ≥ 0.61 or any notching<br>• Birth weight ≤ 3rd centile<br>• Birth weight ≤ 10th centile | • 11/23<br>• 45/123       | • 935/1163<br>• 869/1063  |
| Todros et al, <sup>36</sup> Italy              | 19-24         | 916 (4.6)                                                      | Women with singleton pregnancy, no prepregnancy pathology, no obstetric risk, no chromosomal or structural anomalies                                                                                                                                                                                                                          | Birth weight < 10th centile (local values)                                                   | Unreported route and site, continuous wave + pulsed wave | S/D ratio > 2.7                                                                                          | 5/42                      | 820/874                   |
| Uludag et al, <sup>37</sup><br>Turkey          | 18-20         | 80 (11.3)                                                      | Nonsmokers. Excluded: women with diabetes mellitus, fetal anomalies, multiple pregnancy                                                                                                                                                                                                                                                       | Birth weight < 10th centile (unreported data set)                                            | Transabdominal, colour + pulsed waved, unreported site   | Bilateral notching                                                                                       | 6/9                       | 60/71                     |
| Valensise et al, <sup>38</sup><br>Italy        | 24            | 192 (14.6)                                                     | Low-risk primiparous women with no current or previous relevant medical history ( <i>n</i> = 104). High-risk women with history of pregnancy-induced hypertension, intrauterine growth restriction, intrauterine stillbirth ( <i>n</i> = 88). Excluded: women with intrauterine growth restriction on ultrasound screening or oligohydramnios | Birth weight < 10th centile (gestational values)                                             | Unreported route and site, colour                        | Resistance index > 0.58 (mean)                                                                           | 24/28                     | 149/164                   |
| Valensise et al, <sup>39</sup><br>Italy        | 24            | 272 (7.7)                                                      | Primigravid women. Excluded: women with history of hypertension, diabetes mellitus, systemic lupus erythematosus, pharmacological induction of ovulation, fetal or chromosomal abnormalities                                                                                                                                                  | Birth weight < 10th centile (local values)                                                   | Transabdominal, colour + pulsed wave, crossover          | Resistance index > 0.58                                                                                  | 14/21                     | 239/251                   |
| Zimmermann et al, <sup>40</sup><br>Finland     | 20-24         | 55 (7.2)                                                       | Low-risk women ( <i>n</i> = 29) and high-risk women with family or personal history of pre-eclampsia, chronic hypertension or intrauterine growth restriction or intrauterine stillbirth ( <i>n</i> = 26) (randomized controlled trial)                                                                                                       | Birth weight < 10th centile (local values)                                                   | Unreported route, pulsed wave, crossover                 | Bilateral notching                                                                                       | 3/4                       | 24/51                     |

Note: ASA = acetylsalicylic acid, FN = false negative, FP = false positive, S/D ratio = ratio of peak systolic to late diastolic velocity, SD = standard deviation, TN = true negative, TP = true positive.  
\*Cohort study unless stated otherwise.

**See next page for start of Appendix 4B; see end of document for references.**

Appendix to Cnossen JS, Morris RK, ter Riet G, et al. Uterine artery Doppler ultrasonography to predict pre-eclampsia and intrauterine growth restriction: a systematic review and bivariate meta-analysis. *CMAJ* 2008;178(6):701-11

**Appendix 4B: Patients at high risk of intrauterine growth restriction (part 1 of 6)**

| Study, country                               | Gestation, wk  | Total no. of patients (% with intrauterine growth restriction) | Patient group (study design)*                                                                                                                                                                           | Reference standard for intrauterine growth restriction                                                                                | Details index test                                | Index test cutoff, centile or absolute threshold                                                                                                                                                                                                                           | Sensitivity, TP/(TP + FN)                                                                                                          | Specificity, TN/(FP + TN)                                                                                                                      |
|----------------------------------------------|----------------|----------------------------------------------------------------|---------------------------------------------------------------------------------------------------------------------------------------------------------------------------------------------------------|---------------------------------------------------------------------------------------------------------------------------------------|---------------------------------------------------|----------------------------------------------------------------------------------------------------------------------------------------------------------------------------------------------------------------------------------------------------------------------------|------------------------------------------------------------------------------------------------------------------------------------|------------------------------------------------------------------------------------------------------------------------------------------------|
| Aardema et al, <sup>41</sup> the Netherlands | 21-22          | 94 (10.6)                                                      | Multiparous women with singleton pregnancy who had a history of hypertensive disorders in previous pregnancy but no current pathology                                                                   | Birth weight < 10th centile (local, gestational and sex values)                                                                       | Unreported route, colour + pulsed wave, crossover | <ul style="list-style-type: none"> <li>• Pulsatility index <math>\geq 1.3</math></li> <li>• Any notching</li> </ul>                                                                                                                                                        | <ul style="list-style-type: none"> <li>• 8/10</li> <li>• 5/10</li> </ul>                                                           | <ul style="list-style-type: none"> <li>• 58/84</li> <li>• 64/84</li> </ul>                                                                     |
| Alkazaleh et al, <sup>42</sup> Canada        | 19-23          | 50 (52.0)                                                      | Women with $\alpha$ -fetoprotein > 2.0 multiples of the median and human chorionic gonadotropin > 2.5 multiples of the median                                                                           | Birth weight < 10th centile (sex and gestational values)                                                                              | Unreported route, colour + pulsed wave, crossover | Mean pulsatility index > 1.45 or bilateral notching                                                                                                                                                                                                                        | 21/26                                                                                                                              | 17/24                                                                                                                                          |
| Axt-Flidner et al, <sup>43</sup> Germany     | 19-26          | 52 (13.5)                                                      | High-risk women with singleton pregnancy: history of pre-eclampsia, intrauterine growth restriction, intrauterine stillbirth, abruptio                                                                  | Birth weight < 10th                                                                                                                   | Transabdominal, colour, crossover                 | <ul style="list-style-type: none"> <li>• Any resistance index &gt; 0.58</li> <li>• Both resistance indexes &gt; 0.58</li> <li>• Any resistance index &gt; 0.7</li> <li>• Both resistance indexes &gt; 0.7</li> <li>• Any notching</li> <li>• Bilateral notching</li> </ul> | <ul style="list-style-type: none"> <li>• 7/7</li> <li>• 5/7</li> <li>• 3/7</li> <li>• 2/7</li> <li>• 5/7</li> <li>• 5/7</li> </ul> | <ul style="list-style-type: none"> <li>• 21/45</li> <li>• 36/45</li> <li>• 41/45</li> <li>• 44/45</li> <li>• 23/45</li> <li>• 36/45</li> </ul> |
| Caforio et al, <sup>6</sup> Italy            | 18-20<br>22-24 | 335 (15.2)<br>335 (33.4)                                       | Women with chronic hypertension, diabetes mellitus, autoimmune disease, systemic lupus erythematosus, renal disease; history of stillbirths, fetal growth restriction, pre-eclampsia, habitual abortion | (a) Birth weight < 1750 g<br>(b) Birth weight < 2500 g                                                                                | Unreported route, colour + pulsed wave, crossover | <ul style="list-style-type: none"> <li>• Resistance index &gt; 90th centile</li> <li>• Gestational age 18-20 wk</li> <li>• Gestational age 22-24 wk</li> </ul>                                                                                                             | <ul style="list-style-type: none"> <li>a) 36/51</li> <li>b) 68/112</li> <li>a) 44/57</li> <li>b) 73/120</li> </ul>                 | <ul style="list-style-type: none"> <li>a) 196/284</li> <li>b) 165/223</li> <li>a) 202/277</li> <li>b) 166/215</li> </ul>                       |
| Caruso et al, <sup>44</sup> Italy            | 18-24          | 28 (10.7)<br>28 (39.0)                                         | Women with antiphospholipid syndrome                                                                                                                                                                    | <ul style="list-style-type: none"> <li>• Birth weight &lt; 10th centile (local values)</li> <li>• Birth weight &lt; 1750 g</li> </ul> | Transabdominal, colour + pulsed wave, crossover   | <ul style="list-style-type: none"> <li>• Resistance index &gt; 90th centile</li> <li>• Birth weight &lt; 10th centile</li> <li>• Birth weight &lt; 1750 g</li> </ul>                                                                                                       | <ul style="list-style-type: none"> <li>• 2/3</li> <li>• 9/11</li> </ul>                                                            | <ul style="list-style-type: none"> <li>• 19/25</li> <li>• 17/17</li> </ul>                                                                     |
| Caruso et al, <sup>45</sup> Italy            | 23-24          | 42 (9.5)<br>42 (42.0)                                          | Women with chronic hypertension and singleton pregnancy. Excluded: women autoimmune disease, fetal anomalies, Rhesus isoimmunisation                                                                    | <ul style="list-style-type: none"> <li>• Birth weight &lt; 10th centile (local values)</li> <li>• Birth weight &lt; 2500 g</li> </ul> | Transabdominal, colour, crossover                 | <ul style="list-style-type: none"> <li>• Mean resistance index &gt; 90th centile</li> <li>• Birth weight &lt; 10th centile</li> <li>• Birth weight &lt; 2500 g</li> </ul>                                                                                                  | <ul style="list-style-type: none"> <li>• 4/4</li> <li>• 14/18</li> </ul>                                                           | <ul style="list-style-type: none"> <li>• 27/38</li> <li>• 23/24</li> </ul>                                                                     |

*continued*

**Appendix 4B: Patients at high risk of intrauterine growth restriction (part 2 of 6)**

| Study, country                              | Gestation, wk | Total no. of patients (% with intrauterine growth restriction) | Patient group (study design)*                                                                                                                                                                                                        | Reference standard for intrauterine growth restriction                  | Details index test                                    | Index test cutoff, centile or absolute threshold                                                                                                                                                                                                                                                                                                                                                                                                       | Sensitivity, TP/(TP + FN)                                                                                                                                                                       | Specificity, TN/(FP + TN)                                                                                                                                                                         |
|---------------------------------------------|---------------|----------------------------------------------------------------|--------------------------------------------------------------------------------------------------------------------------------------------------------------------------------------------------------------------------------------|-------------------------------------------------------------------------|-------------------------------------------------------|--------------------------------------------------------------------------------------------------------------------------------------------------------------------------------------------------------------------------------------------------------------------------------------------------------------------------------------------------------------------------------------------------------------------------------------------------------|-------------------------------------------------------------------------------------------------------------------------------------------------------------------------------------------------|---------------------------------------------------------------------------------------------------------------------------------------------------------------------------------------------------|
| Coleman et al, <sup>46</sup><br>New Zealand | 22-24         | 116 (26.7)                                                     | Women with essential and secondary hypertension, renal disease, systemic lupus erythematosus, antiphospholipid syndrome, previous pre-eclampsia or placental abruption. Excluded: women with multiple pregnancy, fetal abnormalities | Birth weight < 10th centile (local values)                              | Transabdominal, colour, crossover                     | <ul style="list-style-type: none"> <li>• Any resistance index &gt; 0.58</li> <li>• Both resistance indexes &gt; 0.58</li> <li>• Any resistance index ≥ 0.7</li> <li>• Both resistance indexes ≥ 0.7</li> <li>• Any notching</li> <li>• Bilateral notching</li> <li>• Any resistance index &gt; 0.58 and any notching</li> <li>• Any resistance index &gt; 0.7 and any notching</li> <li>• Both resistance indexes &gt; 0.7 and any notching</li> </ul> | <ul style="list-style-type: none"> <li>• 26/31</li> <li>• 14/31</li> <li>• 17/31</li> <li>• 8/31</li> <li>• 19/31</li> <li>• 11/31</li> <li>• 19/31</li> <li>• 15/31</li> <li>• 8/31</li> </ul> | <ul style="list-style-type: none"> <li>• 33/85</li> <li>• 67/85</li> <li>• 62/85</li> <li>• 81/85</li> <li>• 59/85</li> <li>• 76/85</li> <li>• 59/85</li> <li>• 69/85</li> <li>• 82/85</li> </ul> |
| Degani et al, <sup>47</sup><br>Israel       | 15            | 124 (31.5)                                                     | Women with singleton pregnancy, accurately dated, previous small-for-gestational-age infant, and no chromosomal or structural anomalies                                                                                              | Birth weight < 10th centile (gestational values)                        | Transabdominal, colour + pulsed wave, unreported site | Mean pulsatility index > 1.12                                                                                                                                                                                                                                                                                                                                                                                                                          | 9/39                                                                                                                                                                                            | 68/85                                                                                                                                                                                             |
| Ferrier et al, <sup>48</sup><br>Australia   | 19-24         | 51 (11.8)                                                      | Women with renal disease other than diabetic nephropathy                                                                                                                                                                             | Birth weight < 10th centile (local and gestational values)              | Transabdominal, colour, crossover                     | Resistance index > 90th centile or notching on placental side or highest value if midline                                                                                                                                                                                                                                                                                                                                                              | 5/6                                                                                                                                                                                             | 36/45                                                                                                                                                                                             |
| Frusca et al, <sup>49</sup> Italy           | 24            | 56 (23.2)                                                      | Women with history of pre-eclampsia and normal blood pressure after that pregnancy                                                                                                                                                   | Birth weight < 10th centile                                             | Transabdominal, colour + pulsed wave, crossover       | <ul style="list-style-type: none"> <li>• Resistance index &gt; 0.58</li> <li>• Any notching</li> <li>• Bilateral notching and resistance index &gt; 0.58</li> </ul>                                                                                                                                                                                                                                                                                    | <ul style="list-style-type: none"> <li>• 11/13</li> <li>• 11/13</li> <li>• 6/13</li> </ul>                                                                                                      | <ul style="list-style-type: none"> <li>• 30/43</li> <li>• 33/43</li> <li>• 41/43</li> </ul>                                                                                                       |
| Geipel et al, <sup>50</sup><br>Germany      | 18-24         | 256 (17.6)                                                     | Women with dichorionic twins. Excluded: women with fetal anomalies, preterm prelabour rupture of membranes, unclear chorionicity, unavailable outcome                                                                                | Birth weight < 10th centile (twin reference ranges in local population) | Unreported route and type, crossover                  | <ul style="list-style-type: none"> <li>• Resistance index &gt; 95th centile (singleton reference)</li> <li>• Resistance index &gt; 95th centile (twin reference)</li> <li>• Resistance index &gt; 95th centile + any notching (twin reference)</li> <li>• Any notching</li> <li>• Bilateral notching</li> </ul>                                                                                                                                        | <ul style="list-style-type: none"> <li>• 4/45</li> <li>• 12/45</li> <li>• 11/45</li> <li>• 16/45</li> <li>• 4/45</li> </ul>                                                                     | <ul style="list-style-type: none"> <li>• 207/211</li> <li>• 187/211</li> <li>• 198/211</li> <li>• 184/211</li> <li>• 201/211</li> </ul>                                                           |
| Geipel et al, <sup>11</sup><br>Germany      | 18-24         | 114 (14.0)                                                     | Patients who underwent intracytoplasmic sperm injection, women with singleton pregnancy                                                                                                                                              | Birth weight < 10th centile (local values)                              | Unreported route, colour, crossover                   | Bilateral notching + mean resistance index > 0.55 or unilateral notching + mean resistance index > 0.65 or no notching + mean resistance index > 0.7                                                                                                                                                                                                                                                                                                   | 7/16                                                                                                                                                                                            | 78/98                                                                                                                                                                                             |

*continued*



**Appendix 4B: Patients at high risk of intrauterine growth restriction (part 3 of 6)**

| Study, country                                  | Gestation, wk      | Total no. of patients (% with intrauterine growth restriction) | Patient group (study design)*                                                                                                                                                                                                                                          | Reference standard for intrauterine growth restriction                                                                                | Details index test                                | Index test cutoff, centile or absolute threshold                                                                                                                                                                                                                        | Sensitivity, TP/(TP + FN)                                                                                    | Specificity, TN/(FP + TN)                                                                                        |
|-------------------------------------------------|--------------------|----------------------------------------------------------------|------------------------------------------------------------------------------------------------------------------------------------------------------------------------------------------------------------------------------------------------------------------------|---------------------------------------------------------------------------------------------------------------------------------------|---------------------------------------------------|-------------------------------------------------------------------------------------------------------------------------------------------------------------------------------------------------------------------------------------------------------------------------|--------------------------------------------------------------------------------------------------------------|------------------------------------------------------------------------------------------------------------------|
| Geipel et al, <sup>11</sup> Germany             | 18-24              | 32 (18.8)                                                      | Patients who underwent intracytoplasmic sperm injection, women with twin pregnancy                                                                                                                                                                                     | Birth weight < 10th centile (local values)                                                                                            | Unreported route, colour, crossover               | Bilateral notching only                                                                                                                                                                                                                                                 | 4/6                                                                                                          | 22/26                                                                                                            |
| Geipel et al, <sup>11</sup> Germany             | 18-24              | 32 (21.8)                                                      | Women with twin pregnancy (control group of intracytoplasmic sperm injection)                                                                                                                                                                                          | Birth weight < 10th centile (local values)                                                                                            | Unreported route, colour, crossover               | Bilateral notching only                                                                                                                                                                                                                                                 | 3/7                                                                                                          | 20/25                                                                                                            |
| Haddad et al, <sup>51</sup> France              | First at mean 23.8 | 48 (18.7)                                                      | Women given ASA therapy because of poor previous outcome, pre-eclampsia, eclampsia, HELLP syndrome, abruption, intrauterine growth restriction, intrauterine stillbirth                                                                                                | Birth weight < 10th centile (local and gestational values)                                                                            | Unreported route and site, continuous waved       | <ul style="list-style-type: none"> <li>• Ratio of diastolic to systolic velocity &lt; 10th centile unilateral</li> <li>• Ratio of diastolic to systolic velocity &lt; 10th centile unilateral or diastolic notching</li> <li>• Unilateral diastolic notching</li> </ul> | <ul style="list-style-type: none"> <li>• 7/9</li> <li>• 8/9</li> <li>• 7/9</li> </ul>                        | <ul style="list-style-type: none"> <li>• 24/39</li> <li>• 21/39</li> <li>• 28/39</li> </ul>                      |
| Harrington et al, <sup>16</sup> United Kingdom  | 19-21              | 170 (10.2)                                                     | Women with chronic hypertension, previous pre-eclampsia, gestational hypertension, intrauterine growth restriction, preterm labour, abruption, intrauterine stillbirth, diabetes mellitus, renal disease, other medical diseases. Excluded: women with fetal anomalies | Birth weight < 5th centile (local values)                                                                                             | Transabdominal, colour + pulsed wave, crossover   | Bilateral notching + mean resistance index $\geq$ 0.55 (50th centile) or unilateral notching + mean resistance index $\geq$ 0.65 (80th centile)                                                                                                                         | 11/26                                                                                                        | 115/144                                                                                                          |
| Hershkovitz et al, <sup>52</sup> United Kingdom | 24                 | 88 (26.1)                                                      | Women with chronic hypertension, history of severe pre-eclampsia, thrombophilia                                                                                                                                                                                        | Birth weight < 10th centile (local, gestational and sex)                                                                              | Unreported route, colour + pulsed wave, crossover | <ul style="list-style-type: none"> <li>• Pulsatility index (mean) &gt; 95th centile or any notching</li> <li>• Pulsatility index (mean) &gt; 95th centile or bilateral notching</li> </ul>                                                                              | <ul style="list-style-type: none"> <li>• 17/23</li> <li>• 12/23</li> </ul>                                   | <ul style="list-style-type: none"> <li>• 49/65</li> <li>• 55/65</li> </ul>                                       |
| Konchak et al, <sup>53</sup> United States      | 17-22              | 103 (17.4)<br>103 (13.5)                                       | Women with $\alpha$ -fetoprotein > 2.0 multiples of the median twice or > 2.5 multiples of the median once. Women with singleton pregnancy, no fetal anomalies, normal amniotic fluid volume                                                                           | <ul style="list-style-type: none"> <li>• Birth weight &lt; 10th centile (local values)</li> <li>• Birth weight &lt; 2500 g</li> </ul> | Transabdominal, colour + pulsed wave, crossover   | Birth weight < 10th centile<br>a) Unilateral notching<br>b) Resistance index $\geq$ 0.7 (95th)<br>Birth weight < 2500 g<br>a) Unilateral notching<br>b) Resistance index $\geq$ 0.7 (95th)                                                                              | <ul style="list-style-type: none"> <li>a) 3/18</li> <li>b) 3/18</li> <li>a) 4/14</li> <li>b) 5/14</li> </ul> | <ul style="list-style-type: none"> <li>a) 79/85</li> <li>b) 77/85</li> <li>a) 84/89</li> <li>b) 83/89</li> </ul> |
| Le Thi Huong et al, <sup>54</sup> France        | 2nd trimester      | 100 (18.0)                                                     | Women with systemic lupus erythematosus, antiphospholipid syndrome                                                                                                                                                                                                     | Birth weight < 10th centile (gestational values)                                                                                      | Unreported route and type, crossover              | Any notching                                                                                                                                                                                                                                                            | 3/15                                                                                                         | 70/85                                                                                                            |

*continued*

**Appendix 4B: Patients at high risk of intrauterine growth restriction (part 4 of 6)**

| Study, country                              | Gestation, wk | Total no. of patients (% with intrauterine growth restriction) | Patient group (study design)*                                                                                                                                                                                                                                                                                   | Reference standard for intrauterine growth restriction                                                                                                     | Details index test                              | Index test cutoff, centile or absolute threshold                                                                                                                                                                                                                          | Sensitivity, TP/(TP + FN)                                                  | Specificity, TN/(FP + TN)                                                    |
|---------------------------------------------|---------------|----------------------------------------------------------------|-----------------------------------------------------------------------------------------------------------------------------------------------------------------------------------------------------------------------------------------------------------------------------------------------------------------|------------------------------------------------------------------------------------------------------------------------------------------------------------|-------------------------------------------------|---------------------------------------------------------------------------------------------------------------------------------------------------------------------------------------------------------------------------------------------------------------------------|----------------------------------------------------------------------------|------------------------------------------------------------------------------|
| Nagtegaal et al, <sup>55</sup><br>Australia | 18-22         | 182 (19.8)<br>182 (12.1)                                       | Women with previous pre-eclampsia, intrauterine growth restriction, placental abruption, recurrent miscarriages, unexplained stillbirth, chronic hypertension, type 1 diabetes mellitus, thrombophilia, positive family history of pre-eclampsia                                                                | <ul style="list-style-type: none"> <li>• Birth weight &lt; 10th centile (local and gestational values)</li> <li>• Birth weight &lt; 5th centile</li> </ul> | Unreported route and site, colour + pulsed wave | Mean resistance index $\geq$ 0.58 + any or no notching or mean resistance index < 0.58 + bilateral notching<br><ul style="list-style-type: none"> <li>• Birth weight &lt; 10th centile (local and gestational values)</li> <li>• Birth weight &lt; 5th centile</li> </ul> | <ul style="list-style-type: none"> <li>• 23/36</li> <li>• 14/22</li> </ul> | <ul style="list-style-type: none"> <li>• 42/146</li> <li>• 47/160</li> </ul> |
| Soregaroli et al, <sup>56</sup><br>Italy    | 24            | 282 (18.0)                                                     | Women with high-risk pregnancy (history of gestational hypertension, pre-eclampsia, intrauterine growth restriction, intrauterine stillbirth, chronic hypertension, autoimmune disease, renal disease)<br>Excluded: women with multiple pregnancy, fetal chromosomal anomalies, pregnancy complications < 24 wk | Birth weight < 10th centile (local and gestational values)                                                                                                 | Transabdominal, colour, crossover               | Resistance index > 0.6 or bilateral notching                                                                                                                                                                                                                              | 40/50                                                                      | 187/232                                                                      |
| Vainio et al, <sup>57</sup><br>Finland      | 12-14         | 72 (5.6)                                                       | Women at high risk for pre-eclampsia. Excluded: women with gestational age outside study limits, asthma, allergy to ASA, peptic ulcer, prostaglandin inhibitor therapy, < 10 d of investigation                                                                                                                 | Birth weight < 10th centile (local values)                                                                                                                 | Transvaginal, colour, uterocervical junction    | Bilateral notching                                                                                                                                                                                                                                                        | 3/4                                                                        | 28/68                                                                        |
| Valensise et al, <sup>58</sup><br>Italy     | 22 and 24     | 16 (43.7)                                                      | Women with chronic hypertension                                                                                                                                                                                                                                                                                 | Birth weight < 10th centile (local and gestational)                                                                                                        | Unreported route, continuous wave, crossover    | Resistance index > 0.58 (+2 SD) + notching                                                                                                                                                                                                                                | 7/7                                                                        | 8/9                                                                          |

*continued*

**Appendix 4B: Patients at high risk of intrauterine growth restriction (part 5 of 6)**

| Study, country                                     | Gestation, wk | Total no. of patients (% with intrauterine growth restriction) | Patient group (study design)*                                                                                                                                               | Reference standard for intrauterine growth restriction          | Details index test                  | Index test cutoff, centile or absolute threshold | Sensitivity, TP/(TP + FN) | Specificity, TN/(FP + TN) |
|----------------------------------------------------|---------------|----------------------------------------------------------------|-----------------------------------------------------------------------------------------------------------------------------------------------------------------------------|-----------------------------------------------------------------|-------------------------------------|--------------------------------------------------|---------------------------|---------------------------|
| van den Elzen et al, <sup>59</sup> the Netherlands | 7-11          | 320 (10.0)                                                     | Women > 35 yr at 20 wk with diastolic blood pressure < 85 mm Hg, no history of hypertension, cardiovascular disease or diabetes who have viable singleton pregnancy < 11 wk | Birth weight < 10th centile (local, sex and gestational values) | Unreported route, colour, crossover | Gestational age 7-11 wk                          | • 22/32                   | • 70/288                  |
|                                                    | 12-13         | 341 (9.4)                                                      |                                                                                                                                                                             |                                                                 |                                     | • Pulsatility index > 1.52 (25th centile)        |                           |                           |
|                                                    | 23-27         | 351 (9.6)                                                      |                                                                                                                                                                             |                                                                 |                                     | • Pulsatility index > 1.78 (50th centile)        |                           |                           |
|                                                    |               |                                                                |                                                                                                                                                                             |                                                                 |                                     | • Pulsatility index > 2.07 (75th centile)        |                           |                           |
|                                                    |               |                                                                |                                                                                                                                                                             |                                                                 |                                     | Gestational age 12-13 wk                         |                           |                           |
|                                                    |               |                                                                |                                                                                                                                                                             |                                                                 |                                     | • Pulsatility index > 1.24 (25th centile)        |                           |                           |
|                                                    |               |                                                                |                                                                                                                                                                             |                                                                 |                                     | • Pulsatility index > 1.41 (50th centile)        |                           |                           |
|                                                    |               |                                                                |                                                                                                                                                                             |                                                                 |                                     | • Pulsatility index > 1.66 (75th centile)        |                           |                           |
|                                                    |               |                                                                |                                                                                                                                                                             |                                                                 |                                     | Gestational age 23-27 wk                         |                           |                           |
|                                                    |               | • Pulsatility index > 0.96 (25th centile)                      |                                                                                                                                                                             |                                                                 |                                     |                                                  |                           |                           |
|                                                    |               | • Pulsatility index > 1.09 (50th centile)                      |                                                                                                                                                                             |                                                                 |                                     |                                                  |                           |                           |
|                                                    |               | • Pulsatility index > 1.23 (75th centile)                      |                                                                                                                                                                             |                                                                 |                                     |                                                  |                           |                           |
| Venkat-raman et al, <sup>60</sup> United Kingdom   | 16-18         | 164 (12.8)                                                     | Women with recurrent miscarriage and antiphospholipid syndrome (no systemic lupus erythematosus or thromboembolic disease)                                                  | Birth weight < 10th centile (local, sex and gestational values) | Unreported route, colour, crossover | Gestational age 16-18 wk                         | a) 16/21                  | a) 81/143                 |
|                                                    | 22-24         | 163 (13.5)                                                     |                                                                                                                                                                             |                                                                 |                                     | a) Any notching                                  |                           |                           |
|                                                    |               |                                                                |                                                                                                                                                                             |                                                                 |                                     | b) Bilateral notching                            |                           |                           |
|                                                    |               |                                                                |                                                                                                                                                                             |                                                                 |                                     | Gestational age 22-24 wk                         |                           |                           |
|                                                    |               | a) Any notching                                                |                                                                                                                                                                             |                                                                 |                                     |                                                  |                           |                           |
|                                                    |               | b) Bilateral notching                                          |                                                                                                                                                                             |                                                                 |                                     |                                                  |                           |                           |
|                                                    |               | b) 5/21                                                        |                                                                                                                                                                             |                                                                 |                                     |                                                  |                           |                           |
|                                                    |               | a) 120/142                                                     |                                                                                                                                                                             |                                                                 |                                     |                                                  |                           |                           |
|                                                    |               | b) 133/142                                                     |                                                                                                                                                                             |                                                                 |                                     |                                                  |                           |                           |

*continued*

**Appendix 4B: Patients at high risk of intrauterine growth restriction (part 6 of 6)**

| Study, country                         | Gestation, wk | Total no. of patients (% with intrauterine growth restriction) | Patient group (study design)*                                                        | Reference standard for intrauterine growth restriction                                                                                                                                                                                                                                    | Details index test                                       | Index test cutoff, centile or absolute threshold                                                                                                                                                                                                                                                                                                                                                                                                                                                                                                                                                                                                                  | Sensitivity, TP/(TP + FN)                                                                                                                                                        | Specificity, TN/(FP + TN)                                                                                                                                                                                |
|----------------------------------------|---------------|----------------------------------------------------------------|--------------------------------------------------------------------------------------|-------------------------------------------------------------------------------------------------------------------------------------------------------------------------------------------------------------------------------------------------------------------------------------------|----------------------------------------------------------|-------------------------------------------------------------------------------------------------------------------------------------------------------------------------------------------------------------------------------------------------------------------------------------------------------------------------------------------------------------------------------------------------------------------------------------------------------------------------------------------------------------------------------------------------------------------------------------------------------------------------------------------------------------------|----------------------------------------------------------------------------------------------------------------------------------------------------------------------------------|----------------------------------------------------------------------------------------------------------------------------------------------------------------------------------------------------------|
| Yu et al, <sup>61</sup> United Kingdom | 22-24         | 351 (8.8)<br>351 (23.6)<br>351 (6.3)<br>351 (17.9)             | Twin pregnancies, 2 live fetuses, no fetal abnormality, no twin transfusion syndrome | <ul style="list-style-type: none"> <li>• Birth weight &lt; 5th centile both twins (local, gestational singleton reference)</li> <li>• Birth weight &lt; 5th centile 1 twin</li> <li>• Birth weight &lt; 3rd centile both twins</li> <li>• Birth weight &lt; 3rd centile 1 twin</li> </ul> | Transvaginal, colour + pulsed wave, level of internal os | <ul style="list-style-type: none"> <li>• Birth weight &lt; 5th centile both twins (local, gestational singleton reference)</li> <li>a) Mean pulsatility index &gt; 1.5 (95th centile)</li> <li>b) Bilateral notching</li> <li>• Birth weight &lt; 5th centile 1 twin</li> <li>a) Mean pulsatility index &gt; 1.5 (95th centile)</li> <li>b) Bilateral notching</li> <li>• Birth weight &lt; 3rd centile both twins</li> <li>a) Mean pulsatility index &gt; 1.5 (95th centile)</li> <li>b) Bilateral notching</li> <li>• Birth weight &lt; 3rd centile 1 twin</li> <li>a) Mean pulsatility index &gt; 1.5 (95th centile)</li> <li>b) Bilateral notching</li> </ul> | <ul style="list-style-type: none"> <li>a) 3/33</li> <li>b) 1/31</li> <li>a) 5/83</li> <li>b) 5/83</li> <li>a) 3/22</li> <li>b) 1/22</li> <li>a) 4/63</li> <li>b) 5/63</li> </ul> | <ul style="list-style-type: none"> <li>a) 305/320</li> <li>b) 309/320</li> <li>a) 255/268</li> <li>b) 261/268</li> <li>a) 314/329</li> <li>b) 318/329</li> <li>a) 274/288</li> <li>b) 281/288</li> </ul> |

\* Cohort study unless otherwise stated.

Note: FN = false negative, FP = false positive, FPR = false positive rate, MoM = multiples of the median, SD = standard deviation, TP = true positive, TN = true negative.

**References**

1. Albaiges G, Missfelder-Lobos H, Lees C, et al. One-stage screening for pregnancy complications by color Doppler assessment of the uterine arteries at 23 weeks' gestation. *Obstet Gynecol* 2000;96:559-64.
2. Arenas J, Fernandez I, Rodriguez-Mon C, et al. Doppler screening of the uterine arteries to predict complications during pregnancy [Spanish]. *Cli Investigacion Ginecologia Obstetricia* 2003;30:178-84.
3. Audibert F, Benchimol Y, Benattar C, et al. Prediction of preeclampsia or intrauterine growth restriction by second trimester serum screening and uterine Doppler velocimetry. *Fetal Diagn Ther* 2005;20:48-53.
4. Bassim S, Lange M, Salzer H. Uterine artery doppler and pregnancy complications in unselected women [German]. *Geburtshilfe Frauenheilkunde* 2006;66:59-62.
5. Bower S, Schuchter K, Campbell S. Doppler ultrasound screening as part of routine antenatal scanning: prediction of pre-eclampsia and intrauterine growth retardation. *Br J Obstet Gynaecol* 1993;100:989-94.
6. Caforio L, Testa AC, Mastromarino C, et al. Predictive value of uterine artery velocimetry at midgestation in low- and high-risk populations: a new perspective. *Fetal Diagn Ther* 1999;14:201-5.
7. Carbillon L, Uzan M, Largilliere C, et al. Prospective evaluation of uterine artery flow velocity waveforms at 12-14 and 22-24 weeks of gestation in relation to pregnancy outcome and birth weight. *Fetal Diagn Ther* 2004;19:381-4.
8. Driul L, Springolo F, Pezzani I, et al. Pathological monolateral Doppler velocimetry of the uterine artery and materno-fetal outcome [Italian]. *Minerva Ginecol* 2002;54:397-402.
9. Dugoff L, Lynch AM, Cioffi-Ragan D, et al. First trimester uterine artery Doppler abnormalities predict subsequent intrauterine growth restriction. *Am J Obstet Gynecol* 2005;193:1208-12.
10. Frusca T, Soregaroli M, Valcamonico A, et al. Doppler velocimetry of the uterine arteries in nulliparous women. *Early Hum Dev* 1997;48:177-85.
11. Geipel A, Ludwig M, Germer U, et al. Uterine artery Doppler velocimetry and the outcome of pregnancies resulting from ICSI. *Hum Reprod* 2001;16:1397-402.
12. Gómez O, Martínez JM, Figueras F, et al. Uterine artery Doppler at 11-14 weeks of gestation to screen for hypertensive disorders and associated complications in an unselected population. *Ultrasound Obstet Gynecol* 2005;26:490-4.

Appendix to Cnossen JS, Morris RK, ter Riet G, et al. Uterine artery Doppler ultrasonography to predict pre-eclampsia and intrauterine growth restriction: a systematic review and bivariate meta-analysis. *CMAJ* 2008;178(6):701-11

13. Hafner E, Metzgenbauer M, Hofinger D, et al. Comparison between three-dimensional placental volume at 12 weeks and uterine artery impedance/notching at 22 weeks in screening for pregnancy-induced hypertension, pre-eclampsia and fetal growth restriction in a low-risk population. *Ultrasound Obstet Gynecol* 2006;27:652-7.
14. Harrington K, Carpenter RG, Goldfrad C, et al. Transvaginal Doppler ultrasound of the uteroplacental circulation in the early prediction of pre-eclampsia and intrauterine growth retardation. *BJOG* 1997;104:674-81.
15. Harrington K, Cooper D, Lees C, et al. Doppler ultrasound of the uterine arteries: the importance of bilateral notching in the prediction of pre-eclampsia, placental abruption or delivery of a small-for-gestational-age baby. *Ultrasound Obstet Gynecol* 1996;7:182-8.
16. Harrington K, Fayyad A, Thakur V, et al. The value of uterine artery Doppler in the prediction of uteroplacental complications in multiparous women. *Ultrasound Obstet Gynecol* 2004;23:50-55.
17. Jorn H, Dinkloh C, Ritter S, et al. Clinical value of mid-pregnancy uterine artery Doppler velocimetry in the prediction of pregnancy complications [German]. *Geburtshilfe Frauenheilkunde*. 2003;63:49-55.
18. Kurdi W, Campbell S, Aquilina J, et al. The role of color Doppler imaging of the uterine arteries at 20 weeks' gestation in stratifying antenatal care. *Ultrasound Obstet Gynecol* 1998;12:339-45.
19. Kurdi W, Fayyad A, Thakur V, et al. Delayed normalization of uterine artery Doppler waveforms is not a benign phenomenon. *Eur J Obstet Gynecol Reprod Biol* 2004;117:20-23.
20. Liberati M, Rotmensch S, Zanolli P, et al. Uterine artery Doppler velocimetry in pregnant women with lateral placentas. *J Perinat Med* 1997;25:133-8.
21. Marchesoni D, Pezzani I, Springolo F, et al. The use of uterine artery Doppler as a screening test for pre-eclampsia. *Ital J Gynaecol Obstet* 2003;15:15-20.
22. Martin AM, Bindra R, Curcio P, et al. Screening for pre-eclampsia and fetal growth restriction by uterine artery Doppler at 11-14 weeks of gestation. *Ultrasound Obstet Gynecol* 2001;18:583-6.
23. Miyakoshi K, Tanaka M, Gabionza D, et al. Prediction of smallness for gestational age by maternal serum human chorionic gonadotropin levels and by uterine artery Doppler study. *Fetal Diagn Ther* 2001;16:42-6.
24. Morris JM, Fay RA, Ellwood DA, et al. A randomized controlled trial of aspirin in patients with abnormal uterine artery blood flow. *Obstet Gynecol* 1996;87:74-8.
25. North RA, Ferrier C, Long D, et al. Uterine artery Doppler flow velocity waveforms in the second trimester for the prediction of preeclampsia and fetal growth retardation. *Obstet Gynecol* 1994;83:378-86.
26. Ohkuchi A, Minakami H, Sato I, et al. Predicting the risk of pre-eclampsia and a small-for-gestational-age infant by quantitative assessment of the diastolic notch in uterine artery flow velocity waveforms in unselected women. *Ultrasound Obstet Gynecol* 2000;16:171-8.
27. Onalan R, Onalan G, Gunenc Z, et al. Combining 2nd-trimester maternal serum homocysteine levels and uterine artery Doppler for prediction of preeclampsia and isolated intrauterine growth restriction. *Gynecol Obstet Invest* 2005;61:142-8.
28. Papageorghiou AT, Yu CK, Bindra R, et al. Multicenter screening for pre-eclampsia and fetal growth restriction by transvaginal uterine artery Doppler at 23 weeks of gestation. *Ultrasound Obstet Gynecol* 2001;18:441-9.
29. Park YW, Lim JC, Kim YH, et al. Uterine artery Doppler velocimetry during mid-second trimester to predict complications of pregnancy based on unilateral or bilateral abnormalities. *Yonsei Med J* 2005;46:652-7.
30. Phupong V, Dejthevaporn T, Tanawattanacharoen S, et al. Predicting the risk of preeclampsia and small for gestational age infants by uterine artery Doppler in low-risk women. *Arch Gynecol Obstet* 2003;268:158-61.
31. Prefumo F, Güven M, Ganapathy R, et al. The longitudinal variation in uterine artery blood flow pattern in relation to birth weight. *Obstet Gynecol* 2004;103:764-8.
32. Schwarze A, Nelles I, Krapp M, et al. Doppler ultrasound of the uterine artery in the prediction of severe complications during low-risk pregnancies. *Arch Gynecol Obstet* 2005;271:46-52.
33. Sekizuka N, Murakoshi T, Yoshizawa H. The uterine and spiral artery flow velocity waveforms in early pregnancy: a transvaginal color and pulsed Doppler study. *J Matern Fetal Invest* 1994;4:229-32.
34. Soutif C, Prevost A, André M. Value of the systematic uterine Doppler in the primiparous woman. a series of 315 cases [in French]. *J Gynecol Obstet Biol Reprod (Paris)* 1996;25:819-23.
35. Subtil D, Goeusse P, Houfflin-Debarge V, et al. Randomised comparison of uterine artery Doppler and aspirin (100 mg) with placebo in nulliparous women: the Essai Regional Aspirine Mère-Enfant study (Part 2). *BJOG* 2003;110:485-91.
36. Todros T, Ferrazzi E, Arduini D, et al. Performance of Doppler ultrasonography as a screening test in low risk pregnancies: results of a multicentric study. *J Ultrasound Med* 1995;14:343-8.
37. Uludag S, Madazli R, Benian A, et al. The relationship between maternal serum alpha fetoprotein and uterine artery Doppler findings at 20-24 weeks' gestation for prediction of preeclampsia and intrauterine growth retardation. *Marmara Med J* 2002;15:169-74.
38. Valensise H, Romanini C. Second-trimester uterine artery flow velocity waveform and oral glucose tolerance test as a means of predicting intrauterine growth retardation. *Ultrasound Obstet Gynecol* 1993;3:412-6.
39. Valensise H, Bezzeccheri V, Rizzo G, et al. Doppler velocimetry of the uterine artery as a screening test for gestational hypertension. *Ultrasound Obstet Gynecol* 1993;3:18-22.
40. Zimmermann P, Eirio V, Koskinen J, et al. Effect of low-dose aspirin treatment on vascular resistance in the uterine, uteroplacental, renal and umbilical arteries: a prospective longitudinal study on a high risk population with persistent notch in the uterine arteries. *Eur J Ultrasound* 1997;5:17-30.
41. Aardema MW, Lander M, Oosterhof H, et al. Doppler ultrasound screening predicts recurrence of poor pregnancy outcome in subsequent pregnancies, but not the recurrence of PIH or preeclampsia. *Hypertens Pregnancy* 2000;19:281-8.
42. Alkazaleh F, Chaddha V, Viero S, et al. Second-trimester prediction of severe placental complications in women with combined elevations in alpha-fetoprotein and human chorionic gonadotrophin. *Am J Obstet Gynecol* 2006;194:821-7.
43. Axt-Flidner R, Schwarze A, Nelles I, et al. The value of uterine artery Doppler ultrasound in the prediction of severe complications in a risk population. *Arch Gynecol Obstet* 2005;271:53-8.
44. Caruso A, De Carolis S, Ferrazzani S, et al. Pregnancy outcome in relation to uterine artery flow velocity waveforms and clinical characteristics in women with antiphospholipid syndrome. *Obstet Gynecol* 1993;82:970-7.
45. Caruso A, Caforio L, Testa AC, et al. Chronic hypertension in pregnancy: color Doppler investigation of uterine arteries as a predictive test for superimposed preeclampsia and adverse perinatal outcome. *J Perinat Med* 1996;24:141-53.
46. Coleman MA, McCowan LM, North RA. Mid-trimester uterine artery Doppler screening as a predictor of adverse pregnancy outcome in high-risk women. *Ultrasound Obstet Gynecol* 2000;15:7-12.
47. Degani S, Leibovich Z, Shapiro I, et al. Early second-trimester low umbilical coiling index predicts small-for-gestational-age fetuses. *J Ultrasound Med* 2001;20:1183-8.
48. Ferrier C, North RA, Becker G, et al. Uterine artery waveform as a predictor of pregnancy outcome in women with underlying renal disease. *Clin Nephrol* 1994;42:362-8.
49. Frusca T, Soregaroli M, Danti L, et al. Uterine artery velocimetry as a screening test in patients with previous preeclampsia. *Ital J Gynaecol Obstet* 1996;8:94-8.
50. Geipel A, Berg C, Germer U, et al. Doppler assessment of the uterine circulation in the second trimester in twin pregnancies: prediction of pre-eclampsia, fetal growth restriction and birth weight discordance. *Ultrasound Obstet Gynecol* 2002;20:541-5.
51. Haddad B, Uzan M, Breart G, et al. Uterine Doppler wave form and the prediction of the recurrence of pre-eclampsia and intra-uterine growth retardation in patients treated with low-dose aspirin. *Eur J Obstet Gynecol Reprod Biol* 1995;62:179-83.

Appendix to Cnossen JS, Morris RK, ter Riet G, et al. Uterine artery Doppler ultrasonography to predict pre-eclampsia and intrauterine growth restriction: a systematic review and bivariate meta-analysis. *CMAJ* 2008;178(6):701-11

52. Hershkovitz R, de Swiet M, Kingdom J. Mid-trimester placentation assessment in high-risk pregnancies using maternal serum screening and uterine artery Doppler. *Hypertens Pregnancy* 2005;24:273-80.
53. Konchak PS, Bernstein IM, Capeless EL. Uterine artery Doppler velocimetry in the detection of adverse obstetric outcomes in women with unexplained elevated maternal serum alpha-fetoprotein levels. *Am J Obstet Gynecol* 1995;173:1115-9.
54. Le Thi Huong D, Wechsler B, Vauthier-Brouzes D, et al. The second trimester Doppler ultrasound examination is the best predictor of late pregnancy outcome in systemic lupus erythematosus and/or the antiphospholipid syndrome. *Rheumatology (Oxford)* 2006;45:332-8.
55. Nagtegaal MJ, van Rijswijk S, McGavin S, et al. Use of uterine Doppler in an Australian level II maternity hospital. *Aust N Z J Obstet Gynaecol* 2005;45:424-9.
56. Soregaroli M, Valcamonico A, Scalvi L, et al. Late normalisation of uterine artery velocimetry in high risk pregnancy. *Eur J Obstet Gynecol Reprod Biol* 2001;95:42-5.
57. Vainio M, Kujansuu E, Koivisto AM, et al. Bilateral notching of uterine arteries at 12-14 weeks of gestation for prediction of hypertensive disorders of pregnancy. *Acta Obstet. Gynecol Scand* 2005;84:1062-7.
58. Valensise H, Romanini C. Uterine Doppler in the identification of patients at risk for hypertension and IUGR. *J Perinat Med* 1994;22 Suppl 1:69-72.
59. van den Elzen HJ, Cohen-Overbeek TE, Grobbee DE, et al. Early uterine artery Doppler velocimetry and the outcome of pregnancy in women aged 35 years and older. *Ultrasound Obstet Gynecol* 1995;5:328-33.
60. Venkat-Raman N, Backos M, Teoh TG, Lo WT, Regan L. Uterine artery Doppler in predicting pregnancy outcome in women with antiphospholipid syndrome. *Obstet Gynecol* 2001;98:235-42.
61. Yu CK, Papageorghiou AT, Boli A, et al. Screening for pre-eclampsia and fetal growth restriction in twin pregnancies at 23 weeks of gestation by transvaginal uterine artery Doppler. *Ultrasound Obstet Gynecol* 2002;20:535-40.
