# Supplementary material
Source: PubMed Central journal article supplement (PMC2263112)
Supplement: cmaj_178_6_701_v2_5.pdf [file cmaj_178_6_701_v2_5.pdf]

**Appendix 5: Quality assessment of whether studies of uterine artery Doppler ultrasonography used to predict pre-eclampsia or uterine growth restriction met the QUADAS criteria\***

| QUADAS criterion                               | No. of studies that did or did not meet QUADAS criterion |    |         |                                           |    |         |
|------------------------------------------------|----------------------------------------------------------|----|---------|-------------------------------------------|----|---------|
|                                                | Pre-eclampsia<br><i>n</i> = 74                           |    |         | Fetal growth restriction<br><i>n</i> = 61 |    |         |
|                                                | Yes                                                      | No | Unclear | Yes                                       | No | Unclear |
| Appropriate patient spectrum                   | 29                                                       | 7  | 38      | 25                                        | 7  | 29      |
| Patient selection criteria clearly described   | 13                                                       | 60 | 1       | 14                                        | 47 | —       |
| Appropriate reference test                     | 60                                                       | 8  | 6       | 34                                        | 26 | 1       |
| Appropriate time between tests                 | NA                                                       | NA | NA      | NA                                        | NA | NA      |
| Avoidance of partial verification bias         | 64                                                       | 5  | 5       | 57                                        | 3  | 1       |
| Avoidance of differential verification bias    | 74                                                       | 0  | 0       | 61                                        | 0  | 0       |
| Independent reference test                     | 74                                                       | 0  | 0       | 61                                        | 0  | 0       |
| Adequate description of index test             | 36                                                       | 29 | 9       | 35                                        | 26 | 0       |
| Adequate description of reference test         | 1                                                        | 71 | 2       | 0                                         | 61 | 0       |
| Blind interpretation of index test results     | 74                                                       | 0  | 0       | 61                                        | 0  | 0       |
| Blind interpretation of reference test results | 15                                                       | 3  | 56      | 12                                        | 5  | 44      |
| Clinical data available                        | 1                                                        | 1  | 72      | 3                                         | 2  | 56      |
| Uninterpretable results reported               | 22                                                       | 13 | 39      | 32                                        | 2  | 27      |
| Withdrawals explained                          | 35                                                       | 7  | 32      | 42                                        | 0  | 19      |
| Preventive intervention used                   | 16                                                       | 1  | 57      | 16                                        | 2  | 43      |

Note: NA = not applicable.

\*QUADAS = quality assessment of diagnostic accuracy studies.<sup>13</sup> See online Appendix 2 for details about the QUADAS questions and the conditions required for the studies to meet the criteria.
